(32,147 characters)

## **Mitotic ER exit site dissociation and reassembly is regulated by TANGO1 phosphorylation status**

Miharu Maeda, Yukie Komatsu and Kota Saito

Department of Biological Informatics and Experimental Therapeutics, Graduate School of Medicine, Akita University 1-1-1, Hondo, Akita, 010-8543, Japan

Running title: TANGO1 phosphorylation mediates mitotic ERES break

Correspondence to Kota Saito ([ksaito@med.akita-u.ac.jp](mailto:ksaito@med.akita-u.ac.jp))

1 **Abstract**

2 **Golgi fragmentation and ER exit site dissociation are considered as the leading**  
3 **causes of mitotic block of secretion from the ER. Although the mechanisms of Golgi**  
4 **fragmentation have been extensively characterized, ER exit block early in mitosis is**  
5 **not well-understood. We previously found that TANGO1 organizes ER exit sites by**  
6 **directly interacting with Sec16. Here, we showed that TANGO1 is phosphorylated**  
7 **by casein kinase 1 (CK1) during mitosis. Interestingly, the interaction with Sec16**  
8 **was abrogated by phosphorylation of TANGO1, leading to dissociation of the ER**  
9 **exit sites. Moreover, a TANGO1 mutant deficient in phosphorylation inhibited the**  
10 **mitotic dissociation of ER exit sites. In contrast, a TANGO1 mutant mimicking**  
11 **CK1-mediated phosphorylation dissociated ER exit sites in interphase cells.**  
12 **Although CK1 activity remains constant throughout the cell cycle, PP1, a**  
13 **phosphatase for which activity decreases during mitosis, participates in the**  
14 **regulation of TANGO1 phosphorylation. This is the first report demonstrating the**  
15 **mechanisms of ER exit site dissociation during mitosis.**

16

## 1 **Introduction**

2 ER to Golgi traffic is blocked during mitosis (Kreiner and Moore, 1990; Warren et al.,  
3 1983). Mitotic Golgi are fragmented into haze, and it remains controversial whether the  
4 Golgi membrane fuses with the ER or remain segregated during mitosis (Pecot and  
5 Malhotra, 2004; Sengupta et al., 2015; Villeneuve et al., 2017; Zaal et al., 1999). The ER  
6 exit site, a specific domain on the ER for vesicle budding, dissociates during mitosis  
7 (Farmaki et al., 1999), but the mechanisms remain unclear. In interphase cells,  
8 mammalian ER exit sites consist of 2–6 cytoplasmic coat protein II (COPII)-coated pits  
9 according to electron microscopic analysis (Bannykh et al., 1996; Zeuschner et al., 2006).  
10 Although COPII-vesicle formation at ER exit sites has been extensively characterized,  
11 the biogenesis of ER exit sites is poorly understood (Maeda et al., 2019; Saito and Katada,  
12 2015; Saito et al., 2017). Sec16, a peripheral membrane protein localized at ER exit sites,  
13 is thought to be an organizer of these sites (Miller and Schekman, 2013). However, it  
14 must first be recruited to ER membranes to perform its functions. TANGO1(L) was  
15 identified as cargo receptor for large cargoes including collagens and chylomicrons (Saito  
16 et al., 2009; Santos et al., 2016). Interestingly, we recently showed that TANGO1L, in  
17 cooperation with its alternatively-spliced isoform TANGO1S, organizes the ER exit site  
18 by interacting with and recruiting Sec16 to these sites (Maeda et al., 2017; Maeda et al.,  
19 2016). Thus, Sec16 and TANGO1 are key organizers of ER exit sites (Maeda et al., 2017;  
20 Saito and Maeda, 2019). However, it remained unknown how these organizations are  
21 regulated by the cell cycle.

22 ER exit sites sense alterations in signaling and change secretion profiles accordingly  
23 (Centonze and Farhan, 2019). ERK2-mediated Sec16 phosphorylation leads to an  
24 increased number of ER exit sites in response to growth factor signals (Farhan et al.,  
25 2010; Tillmann et al., 2015). In contrast, amino-acid deprivation induces Sec16  
26 phosphorylation by ERK7, leading to ER exit site dissociation (Zacharogianni et al.,  
27 2011). Recent reports suggest that the ER contains a tyrosine kinase, LTK, which  
28 phosphorylates Sec12, a guanine-nucleotide exchange factor for Sar1, for efficient  
29 secretion (Centonze et al., 2019). Moreover, Sec24, a cargo-interacting subunit of the  
30 inner COPII-coat senses cargo folding status and activates cargo export machinery while  
31 inhibiting protein synthesis (Subramanian et al., 2019). As described, most proteins at ER  
32 exit sites have been reported to respond to external signaling; however, the mechanisms  
33 underlying ER exit site dissociation at the onset of mitosis remain poorly understood.

1        Here, we identified TANGO1 as a regulator of ER exit site dissociation during mitosis.  
2        TANGO1 phosphorylation was found to be regulated by kinase and phosphatase, namely  
3        CK1 and PP1, coordination. CK1-mediated TANGO1 phosphorylation reduces binding  
4        to Sec16, leading to the dissociation of ER exit sites. CK1 constantly phosphorylates  
5        TANGO1, whereas PP1 dephosphorylates TANGO1 but the activity is decreased during  
6        mitosis. Accordingly, TANGO1 phosphorylation is only upregulated during mitosis. This  
7        is the first report revealing the mechanisms of ER exit site dissociation during mitosis.

8

9

## 1 **Results**

### 2 **CK1 regulates ER exit site organization**

3 Although previous reports suggested that CK1 $\delta$  is involved in COPII vesicle budding  
4 from the ER (Lord et al., 2011), the mechanisms were unclear. First, we expressed CK1 $\alpha$   
5 and CK1 $\delta$  and evaluated their effects on ER exit site organization. CK1 $\alpha$  expression did  
6 not affect the localization of Sec16 and Sec31 (Fig. 1A upper panel). In contrast, CK1 $\delta$   
7 expression resulted in dissociation of Sec16 and Sec31, as observed in cells depleted of  
8 TANGO1L and TANGO1S (Fig. 1A middle panel) (Maeda et al., 2017). The kinase  
9 inactive form of CK1 $\delta$ , K38R, did not induce dissociation, suggesting that kinase activity  
10 is required for this process (Fig. 1A, bottom panel). Quantitative analysis showed that the  
11 colocalization efficiency between Sec16 and Sec31 was significantly reduced by  
12 expression of CK1 $\delta$  but not by CK1 $\alpha$  or CK1 $\delta$  K38R (Fig. 1B). CK1 $\delta$  expression did not  
13 alter the expression of other proteins tested including TANGO1 (Fig. 1C). Because the  
14 function of CK1 $\delta$  considerably overlaps with CK1 $\epsilon$  (Schitteck and Sinnberg, 2014;  
15 Venerando et al., 2014), we next examined the organization of ER exit sites upon  
16 depletion of CK1 $\delta$  and CK1 $\epsilon$ . As shown in Fig. 1D, following depletion of CK1  $\delta$  and  
17 CK1 $\epsilon$ , ER exit sites stained by Sec16, Sec23, and Sec31 were enlarged. Quantitative  
18 analysis revealed that the numbers of small and large ER exit sites were decreased and  
19 increased, respectively, following CK1 depletion (Fig. 1E), without affecting the  
20 expression of other proteins (Fig. 1F). Next, we used IC261, an ATP-competitive specific  
21 inhibitor for CK1 $\delta$  and CK1 $\epsilon$  (Mashhoon et al., 2000). Interestingly, cells treated with  
22 the inhibitor showed a similar phenotype as CK1-depleted cells (Fig. 1G and H). These  
23 results suggest that CK1 $\delta$  and CK1 $\epsilon$  are involved in organizing ER exit sites through their  
24 kinase activities. Because Sec23 has been identified as a substrate for CK1 $\delta$  (Lord et al.,  
25 2011), we predicted that CK1-mediated Sec23 phosphorylation regulates the organization  
26 of ER exit sites. In this case, Sec23 depletion would eliminate the effect of IC261-  
27 mediated enlargement of ER exit sites. We depleted Sec23 from HeLa cells and examined  
28 the size of ER exit sites. As shown in Fig. S1A and B, enlarged ER exit sites were still  
29 observed following IC261 treatment, even in Sec23-depleted cells. Thus, it is unlikely  
30 that CK1-mediated regulation of ER exit site size is mediated by Sec23 phosphorylation.

31

### 32 **CK1 reduces the interaction between Sec16 and TANGO1**

1 To further investigate the effect of CK1 on ER exit site organization, we determined  
2 whether CK1 interacts with other proteins at ER exit sites. As shown in Fig. 2A, we found  
3 that CK1 $\delta$  interacts with Sec16 (Fig. 2A, lanes 1 and 2). The kinase activity of CK1 $\delta$  did  
4 not affect this interaction (Fig. 2A, lanes 3 and 4). To determine the interaction domain  
5 on Sec16, we examined interactions between Sec16 deletion constructs and CK1 (Fig.  
6 2B). Sec16 (1101–1600) and Sec16 (1601–1890) efficiently interacted with CK1 $\delta$  (Fig.  
7 2C). When Sec16 was truncated into the TANGO1-interacting region (1101–1400), the  
8 interaction was reduced but not eliminated (Fig. 2C) (Maeda et al., 2017). These results  
9 suggest that Sec16 possesses multiple CK1-interacting regions that can be mapped to  
10 1101–1890. In contrast, TANGO1S failed to interact with CK1 (Fig. 2D). We previously  
11 showed that the interaction between TANGO1 and Sec16 is vital for proper ER exit site  
12 organization (Maeda et al., 2017). Thus, we next examined whether CK1 regulates ER  
13 exit site organization via TANGO1/Sec16. Our previous data showed that TANGO1S  
14 and TANGO1L have redundant functions in organizing ER exit sites; thus, we used only  
15 TANGO1S for further assays (Maeda et al., 2017). As expected, Sec16 interacted with  
16 both TANGO1S and CK1 $\delta$ ; however, the interaction between TANGO1 and Sec16 was  
17 markedly reduced when CK1 $\delta$  was added (Fig. 2E). These results indicate that CK1  
18 organizes ER exit sites by modulating TANGO1–Sec16 interactions.

19

## 20 **CK1-mediated TANGO1 phosphorylation dissociates ER exit sites**

21 The above results suggest that the kinase activity of CK1 is important for ER exit site  
22 organization. Thus, we searched for possible phosphorylation sites within TANGO1 and  
23 Sec16 using the PhosphositePlus and NetPhos databases (Blom et al., 1999; Hornbeck et  
24 al., 2015). We found phosphorylation hotspots within TANGO1 just upstream of the  
25 proline-rich domain (PRD) and named these sites as phosphorylation predicted sequences  
26 (PPS) (Fig. 3A). PPS alignment indicated that this region is well-conserved among  
27 species (Fig. 3B). Next, we mutated serine or threonine to alanine in the PPS (SA mutant)  
28 and evaluated whether this region is phosphorylated via CK1 in an *in vitro* kinase assay.  
29 We used CK1 without the C-terminal regulatory domain for hyperactivation (Graves and  
30 Roach, 1995). Recombinant TANGO1 PPS+PRD or the corresponding SA mutant were  
31 incubated either with wild-type or kinase-dead CK1 $\delta$  in the presence of [ $\gamma$ - $^{32}$ P] ATP (Fig.  
32 S2). As shown in Fig. 3C, wild-type CK1 $\delta$  efficiently phosphorylated TANGO1  
33 PPS+PRD but failed to phosphorylate the SA mutant, strongly suggesting that the

1 TANGO1 PPS is phosphorylated by CK1 $\delta$ . The inefficient phosphorylation by kinase-  
2 dead CK1 validated the specificity of this effect. Next, we prepared TANGO1S with the  
3 phosphorylation mimic (TANGO1S (SE)-HA) or inefficient mutations (TANGO1S  
4 (SA)-HA) and examined their interactions with Sec16. Coimmunoprecipitation analysis  
5 revealed that SE mutants reduced the binding to Sec16, whereas SA mutants enhanced  
6 the binding to Sec16 compared to wild-type TANGO1S (Fig. 4A). These data indicate  
7 that phosphorylation of TANGO1 by CK1 reduced the interaction with Sec16. Indeed,  
8 the interaction between TANGO1 and Sec16 was not susceptible to CK1 $\delta$  when the  
9 TANGO1 SA mutant was used rather than the wild-type protein (Compare Fig. 2E and  
10 Fig. 4B). Next, we examined whether TANGO1 mutants affect the organization of ER  
11 exit sites. We previously showed that Sec16 and Sec31 dissociates upon TANGO1  
12 depletion, which cannot be rescued by TANGO1 lacking the Sec16-interacting region  
13 (Maeda et al., 2017). We depleted TANGO1L and TANGO1S and expressed TANGO1  
14 SE and SA mutants. Immunofluorescence data are shown in Fig. 4C and quantitative data  
15 in Fig. 4D. Although wild-type TANGO1S and SA mutants efficiently rescued the  
16 dissociation between Sec16 and Sec31, SE mutants failed to correct the dissociation of  
17 ER exit sites. These data strongly suggest that CK1-mediated TANGO1 phosphorylation  
18 in PPS regulates ER exit site organization. We made series of mutations in the TANGO1  
19 PPS to identify the critical residues for CK1 phosphorylation (Fig. S3A). We examined  
20 not only the binding properties between Sec16 and TANGO1 mutants (Fig. S3B), but  
21 also the organizing efficiency of TANGO1 mutants (Fig. S3C). The data indicated that  
22 the number of mutations affects both the binding properties and organization, while  
23 critical residues important for regulating ER exit site organization were not likely existed.  
24 Thus, the degree of phosphorylation in TANGO1's PPS by CK1 regulates the  
25 organization of ER exit sites.

26

### 27 **Mitotic ER exit site dissociation is mediated by TANGO1 phosphorylation.**

28 Secretion from the ER is blocked during mitosis, which dramatically affects ER exit site  
29 organization (Farmaki et al., 1999; Kreiner and Moore, 1990). However, the mechanisms  
30 of ER exit site dissociation during mitosis are unknown. Previous reports suggest that  
31 Sec16 and Sec31 are disorganized during mitosis (Hughes and Stephens, 2010). These  
32 results prompted us to investigate whether TANGO1 phosphorylation is involved in ER  
33 exit site disorganization during mitosis. Cells were synchronized with double thymidine

1 block, and metaphase cells were selected to analyze ER exit sites. As shown in Fig. 5A,  
2 Sec16 and Sec31 showed distinct staining in metaphase, as previously reported (Hughes  
3 and Stephens, 2010). Quantitative analysis clearly indicated that colocalization efficiency  
4 between Sec16 and Sec31 was significantly reduced during mitosis (Fig. 5B). Notably,  
5 reduced colocalization was also observed between TANGO1 and Sec31 in mitotic cells,  
6 suggesting that ER exit site dissociation occurs for both peripheral membrane and  
7 membrane proteins (Fig. 5C and D).

8 We thus evaluated whether TANGO1 phosphorylation is upregulated during mitosis.  
9 Phos-tag blot analysis of cells stably expressing TANGO1 constructs revealed that wild-  
10 type TANGO1 is hyperphosphorylated during mitosis (Fig. 5E). In contrast, TANGO1  
11 SA mutants were not phosphorylated in mitotic cells, suggesting that mitotic TANGO1  
12 phosphorylation predominantly occurs at the PPS (Fig. 5E). Based on these results, we  
13 hypothesized that ER exit site dissociation during mitosis is regulated by TANGO1  
14 phosphorylation.

15 To test this, we investigated if the expression of TANGO1 SA mutants affects ER exit  
16 site organization during mitosis. Cells stably expressing wild-type TANGO1 or TANGO1  
17 SA mutants were synchronized at metaphase and Sec16/Sec31 and TANGO1/Sec31  
18 colocalization rates were quantified. As shown in Fig. 5F and H, metaphase cells  
19 expressing wild-type TANGO1 showed reduced Sec16/Sec31 and TANGO1/Sec31  
20 colocalization rates compared to those in wild-type cells. Conversely, metaphase cells  
21 expressing TANGO1 SA mutants clearly showed punctate structures that were stained  
22 both by Sec16/Sec31 and TANGO1/Sec31. Quantitative analysis suggested that cells  
23 expressing TANGO1 SA mutants had significantly increased colocalization efficiencies  
24 between two components (Fig. 5 G and I). These results strongly suggest that mitotic ER  
25 exit site dissociation is mediated by TANGO1 hyperphosphorylation during mitosis.

26

### 27 **PP1 is involved in the TANGO1-mediated ER exit site organization.**

28 Evidence that CK1 activity is enhanced during mitosis is lacking. Thus, we speculated  
29 that other kinases or phosphatases are involved in TANGO1 hyperphosphorylation during  
30 mitosis. It has been known that protein phosphatase1 (PP1) and protein phosphatase 2A  
31 (PP2A)-B55 activities are downregulated during mitosis (Nilsson, 2019). Thus, we  
32 checked if these phosphatases are involved in ER exit site organization. Although  
33 endothall, a specific inhibitor of PP2, had no effects on ER exit site organization, cells



1 treated with okadaic acid (PP1/PP2 inhibitor) showed reduced colocalization efficiency  
2 between Sec16 and Sec31 (Fig. 6A and B). The depletion of PP1 by siRNAs also reduced  
3 colocalization between Sec16 and Sec31, strongly suggesting that PP1 is involved in ER  
4 exit site organization (Fig. 6C–E). We then checked the phosphorylation status of  
5 TANGO1 upon okadaic-acid treatment. TANGO1 phosphorylation was significantly  
6 increased by okadaic acid (Fig. 6F), indicating that PP1 dephosphorylates TANGO1 in  
7 interphase cells. In addition, TANGO1 SA mutants showed no changes upon drug  
8 treatment (Fig. 6F). These data suggest that PP1 predominantly dephosphorylates the PPS  
9 region of TANGO1, which can be phosphorylated by CK1. We next checked whether ER  
10 exit site dissociation mediated by okadaic acid treatment could be rescued by the  
11 expression of TANGO1 SA mutants. As shown in Fig. 6G, the expression of TANGO1  
12 SA mutants significantly increased colocalization efficiency between Sec16 and Sec31  
13 under okadaic acid treatment. Together, ER exit site organization is regulated by  
14 TANGO1 phosphorylation status, which can be controlled by CK1-mediated  
15 phosphorylation and PP1-mediated dephosphorylation.

16

### 17 **CK1 is required for mitotic ER exit site dissociation.**

18 PP1 activity is repressed through phosphorylation by Cdk1–cyclinB1 from the early onset  
19 of mitosis to anaphase. If CK1 is the predominant kinase for TANGO1 phosphorylation  
20 and TANGO1 hyperphosphorylation is due to the reduced kinase activity of PP1 during  
21 mitosis, CK1 depletion would also inhibit ER exit site dissociation during mitosis. As  
22 shown in Fig. 7A, CK1  $\delta/\epsilon$ -depleted cells synchronized at metaphase clearly showed  
23 punctate structures that were stained by both Sec16 and Sec31. Quantitative analysis  
24 suggested that cells depleted of CK1  $\delta/\epsilon$  showed significantly increased colocalization  
25 efficiency between Sec16 and Sec31 (Fig. 7B). Cells synchronized at prometaphase by  
26 nocodazole block also showed punctate structures visualized by detecting Sec16 and  
27 Sec31 upon CK1  $\delta/\epsilon$  knockdown (Fig. S4A and B). Moreover, colocalization between  
28 TANGO1 and Sec31 was also increased during mitosis upon CK1  $\delta/\epsilon$  depletion (Fig. 7C  
29 and D). These data suggest that CK1  $\delta/\epsilon$  are the predominant kinases mediating TANGO1  
30 phosphorylation for mitotic ER exit site dissociation.

31

## 1 **Discussion**

2 We previously showed that TANGO1 and Sec16 organize ER exit sites through their  
3 interaction (Maeda et al., 2017). In this study, we identified TANGO1 as a regulator of  
4 ER exit site organization during the cell cycle. We showed that the TANGO1 PPS is  
5 hyperphosphorylated during mitosis, which reduces binding affinity to Sec16, leading to  
6 the dissociation of ER exit sites. Interestingly, the interaction domain of TANGO1 for  
7 Sec16 is not on the PPS but rather on the Sec16-interacting region, a domain  
8 approximately 40 amino acids downstream of the PPS. Structural analysis is necessary to  
9 determine how PPS phosphorylation affects the binding between TANGO1 and Sec16.  
10 We tried to map the critical phosphorylation residues of TANGO1 PPS; however, it seems  
11 likely that multiple phosphorylation events occur in the PPS and the degree of  
12 phosphorylation correlates with the binding affinity for Sec16. Similar regulation was  
13 observed for the NDC80 complex, in which multiple phosphorylation events change the  
14 affinity for microtubules (Zaytsev et al., 2015). These results imply that a balance of  
15 kinase and phosphatase activities is crucial to regulate multiple TANGO1  
16 phosphorylation events, which then regulates the organization of ER exit sites (Gelens et  
17 al., 2018).

18

19 During mitosis, intracellular organelles and domains undergo extensive rearrangements  
20 to achieve controlled division (Jongsma et al., 2015) (Fig. 8A). In addition, increased  
21 evidence suggest that intracellular membrane trafficking is attenuated during mitosis  
22 (Yeong, 2013). Mechanisms of Golgi inheritance have been extensively characterized,  
23 and a considerable number of kinases including Cdk1, Mek1, Erk1/2, Myt1, and Plk1  
24 were identified as responsible for Golgi fragmentation at the entry of mitosis (Valente  
25 and Colanzi, 2015). Kinase activity has also been shown to be important for diminished  
26 traffic within the Golgi (Nakamura et al., 1997; Stuart et al., 1993). It is still controversial  
27 though whether fragmented Golgi stays as a Golgi haze or fuses with the ER during  
28 metaphase (Sengupta et al., 2015; Villeneuve et al., 2017) (Fig. 8A). In either case, Golgi  
29 reassembly begins at telophase. Agreement has yet to be reached as to how the ER divides  
30 during mitosis. The ER cisternae were reported to be remodeled into tubules, although  
31 other reports suggested that they remain throughout the cell cycle (Lu et al., 2009; Puhka  
32 et al., 2007). In addition, it has been shown that export from the ER is attenuated (Kreiner  
33 and Moore, 1990; Warren et al., 1983) and ER exit site are dissociated during mitosis

1 (Hammond and Glick, 2000; Hughes and Stephens, 2010). However, compared to the  
2 number of kinases identified during Golgi fragmentation, few have been reported to  
3 regulate ER exit site organization and ER export during mitosis. Cdc2-mediated p47  
4 phosphorylation was reported to disorganize ER exit sites in semi-intact cells, but how  
5 this signal regulates the ER exit site remains unknown (Kano et al., 2004). Moreover, a  
6 further study suggested that p47 phosphorylation rather regulates ER network disruption,  
7 indicating that the effect of p47 on the ER exit site might be indirect (Kano et al., 2005).  
8 In this study, we identified CK1 and PP1 as a kinase and a phosphatase that directly  
9 regulate ER exit site organization via TANGO1 during mitosis. We propose that CK1-  
10 mediated disassembly of ER exit sites would be a critical event regulating the mitotic  
11 block in secretion from the ER.

12

13 We have discovered CK1 as a kinase that regulates TANGO1 PPS, and PP1 as a  
14 phosphatase for this domain. As shown in Fig. 8B, CK1 activity is rather constant  
15 throughout cell cycle progression, whereas PP1 activity is suppressed with  
16 phosphorylation by Cdk1–cyclin B1 at the onset of mitosis. The phosphorylation status  
17 of TANGO1 in interphase cells is somewhat at equilibrium based on phosphorylation by  
18 CK1 and dephosphorylation by PP1 (Fig. 8C). Conversely, TANGO1 is  
19 hyperphosphorylated during mitosis due to the loss of PP1 activity (Fig. 8C). We showed  
20 that TANGO1 with a phosphomimic mutant reduces interactions with Sec16, leading to  
21 the dissociation of ER exit sites (see Fig. 4A–D). Thus, we propose that ER exit site  
22 dissociation during mitosis is mediated by TANGO1 phosphorylation, which reduces  
23 binding to Sec16 (Fig. 8D). Indeed, our data suggest that overexpression of a non-  
24 phosphorylated form of TANGO1 inhibits ER exit site dissociation during mitosis (Fig.  
25 5 F–H). Surprisingly, the ER exit site is restored by CK1 depletion in mitotic cells,  
26 suggesting that CK1 is a predominant kinase phosphorylating TANGO1. Our former  
27 study suggests that the depletion of TANGO1 (both TANGO1L and TANGO1S) results  
28 in the dissociation of ER exit sites (i.e. reduced colocalization rate between Sec16 and  
29 Sec31) and delays secretion. Thus, we speculate that mitotic TANGO1 phosphorylation  
30 also reduces secretion from the ER. Another COPII component, Sec24, is reportedly  
31 phosphorylated during mitosis, although the functional significance of this is not clear  
32 (Dudognon et al., 2004). We presume that a block in mitotic secretion would be achieved

1 by the coordinated actions of COPII components regulated by mitotic kinases and  
2 phosphatases. TANGO1 should be in the center of these regulatory events.

3  
4 Cells depleted of CK1 showed enlarged ER exit sites in interphase cells, strongly  
5 suggesting that phosphorylated TANGO1 exists to certain extent even in interphase cells  
6 (Fig. 8C). It is possible that TANGO1 phosphorylation is regulated not only by cell cycle  
7 progression but also by other cellular signaling. Indeed, it is known that CK1 $\delta/\epsilon$  regulate  
8 many cellular processes including the circadian rhythm (Xu et al., 2019; Yang et al.,  
9 2017). Thus, it would be interesting to determine whether TANGO1 phosphorylation by  
10 CK1 regulates ER exit site organization and secretion from the ER, which is dependent  
11 on cellular conditions such as circadian cycles. A yeast orthologue of CK1 $\delta/\epsilon$ , Hrr25, has  
12 been identified as a suppressor mutant for temperature-sensitive growth defects in the  
13 *Sec12-4* mutant (Murakami et al., 1999). Data indicate that Hrr25 negatively regulates  
14 ER export in yeast; however, the substrate responsible remains to be identified. TANGO1  
15 is conserved only through metazoans; however, the function of CK1 in the negative  
16 regulation of ER export seems to be conserved from yeast to humans. CK1 also  
17 phosphorylates Sec23 to mediate COPII vesicle fusion with the Golgi (Lord et al., 2011).  
18 The phosphatase for Sec23 is PP6, and not PP1 (Bhandari et al., 2013). One interesting  
19 hypothesis would be that the phosphorylation status of these proteins might be regulated  
20 not by kinases but by phosphatases. In terms of regulatory activity, PP1 normally  
21 assembles to holoenzyme complexes with regulatory subunits. To date, hundreds of  
22 holoenzymes have been identified (Moura and Conde, 2019; Nilsson, 2019). Each  
23 holoenzyme shows distinct localization and different substrate binding properties  
24 according to the regulatory subunit. Thus, it is critical to identify the regulatory subunit  
25 responsible for TANGO1 dephosphorylation. Our current data did not preclude the  
26 possibility that TANGO1 PPS can be phosphorylated by kinases other than CK1 (and  
27 dephosphorylated by phosphatases other than PP1). It is worth determining whether the  
28 phosphorylation status of PPS can be regulated by external signals such as growth factors,  
29 cellular stress, and autophagy. Thus, TANGO1 might be a hub that controls ER exit site  
30 organization mediated by variations in cellular signaling.

31  
32 In this study, we identified CK1 $\delta/\epsilon$  and PP1 as regulators of ER exit site organization  
33 during the cell cycle. In addition, we revealed that the phosphorylation status of TANGO1

- 1 is important for the regulation of ER exit site organization. This is the first report to
- 2 describe the precise molecular mechanism of mitotic ER exit site dissociation.
- 3

## 1 **MATERIALS AND METHODS**

### 2 **Antibodies**

3 A female 6-wk-old Wistar rat (CLEA Japan) was immunized with FLAG-tagged Sec23A  
4 in TiterMax Gold (TiterMax USA). Splenocytes were fused with PAI mouse myeloma  
5 cells using polyethylene glycol (Roche). Hybridoma supernatants were screened by  
6 indirect ELISA with His-tagged Sec23A as the antigens. Positive hybridoma lines were  
7 subcloned, grown in serum-free medium (Nihon Pharmaceutical) supplemented with  
8 hypoxanthine-thymidine (Thermo Fisher Scientific), and purified with protein G-  
9 Sepharose (GE Healthcare; Saito et al., 2014). Polyclonal antibodies against Sec16-N  
10 (374–387 aa), Sec16-C (2,319–2,332 aa), and TANGO1-CT (1,884–1,898 aa for  
11 TANGO1L; 762–776 aa for TANGO1S) were raised in rabbits by immunization with  
12 keyhole limpet hemocyanin-conjugated peptides and affinity-purified by columns  
13 conjugated with the peptides (Thermo Fisher Scientific; Iinuma et al., 2007; Saito et al.,  
14 2009, 2011; Maeda et al., 2016; Tanabe et al., 2016). Polyclonal antibodies against Sec31  
15 and TANGO1-CC1 were raised in rabbits by immunization with recombinant Sec31  
16 (522–719 aa) or GST-tagged TANGO1L (1,231–1,340 aa) [TANGO1S (109–218 aa)] and  
17 affinity-purified by columns conjugated with GST-tagged Sec31 (522–719 aa) or ColdTF-  
18 tagged TANGO1 (1,231–1,340 aa) [TANGO1S (109–218 aa)] (Saito et al., 2011; Tanabe  
19 et al., 2016). Other antibodies were as follows: CK1 $\delta$  (rabbit; Proteintech), CK1 $\epsilon$  (mouse;  
20 BD), PPP1CA (mouse; Santa Cruz), PPP1CB (mouse; Santa Cruz), GAPDH (mouse;  
21 Merck), FLAG (mouse; Merck), FLAG (rat; agilent), HA (rat; Roche), and Sec31 (mouse;  
22 BD).

23

### 24 **Cell culture and transfection**

25 HeLa and 293T cells were cultured in DMEM supplemented with 10% fetal bovine serum.  
26 Lipofectamine RNAi max (Thermo Fisher Scientific) was used for transfecting siRNA.  
27 For plasmids transfection, polyethylenimine “MAX” (polysciences) or Fugene 6  
28 (Promega) were used. Doxycycline-inducible stable cell lines expressing TANGO1S-  
29 FLAG, TANGO1S (SA)-FLAG were made with lentivirus system described previously  
30 (Shin et al., 2006). Proteins were induced by incubation with 1  $\mu$ g/ml doxycycline for the  
31 indicated times.

32

### 33 **Double thymidine block**

1 Cells treated with siRNAs were incubated for 22 h and then treated with 2.5 mM  
2 thymidine for 16 h. The cells were washed three times with PBS and released for 8 h.  
3 Then, the cells were incubated further with 2.5 mM thymidine for 16 h, washed three  
4 times with PBS and released for 10 h before fixation.

5

#### 6 **Nocodazole block**

7 Cells treated with siRNA were incubated for 59 h and then treated with 100 ng/ml  
8 nocodazole for 13 h before fixation or collecting by shake-off.

9

#### 10 **Immunoprecipitation and western blotting**

11 The experiments were essentially performed as described previously (Saito et al., 2014).  
12 Cells extracted with extraction buffer consisting of 20 mM Tris-HCl (pH7.4), 100 mM  
13 NaCl, 1 mM EDTA, 1% Triton X-100, and protease inhibitors were centrifuged at 20,000  
14 g for 15 min at 4°C. Cell lysates were immunoprecipitated with FLAG M2 antibodies  
15 (SIGMA). The beads were washed with TBS/0.1% Triton X-100 for five times followed  
16 by elution with DYKDDDK peptide and processed for sample preparation.

17

#### 18 **Biotinylated Phos-tag detection**

19 Biotinylated Phos-tag analysis of phosphorylated proteins were conducted essentially as  
20 described previously (Kinoshita et al., 2006). The samples were resolved by SDS-PAGE  
21 followed by blotting to PVDF membranes. The membranes were probed with Phos-tag  
22 Biotin (Fuji Film) and then probed with Streptavidin-conjugated HRP (Fuji Film) for  
23 detection.

24

#### 25 **siRNA oligos**

26 Stealth select siRNAs for TANGO1S, TANGO1L, Sec23A, and Sec23B were purchased  
27 from Thermo Fisher Scientific. The oligo sequences used were

28 TANGO1S siRNA, 5'-GAAUUGUCGCUUGCGUUCAGCUGUU-3';

29 TANGO1L siRNA, 5'-CAACUCAGAGGAAAGUGAUAGUGUA-3';

30 Sec23A siRNA (1119), 5'-GGGUGAUUCUUCAAUACUCCUUA-3';

31 Sec23A siRNA (366), 5'-GCGUGGUCCUCAGAUGCCUUUGAUA-3';

32 Sec23B siRNA (1021), 5'-GCUGCAAUUGGUCACUGCAUUGAUA-3';

33 Sec23B siRNA (1923), 5'-CAGCAGCAUUCUAGCUGACAGAAUU-3'.

1 For control siRNA, Stealth RNAi™ siRNA negative control med GC (Thermo Fisher  
2 Scientific) was used.  
3 Mission siRNA was purchased from Merck. The oligo sequences used were  
4 CK1δ siRNA (335), 5'-UGAUCAGUCGCAUCGAAUA-3';  
5 CK1δ siRNA (707), 5'-CCAUCGAAGUGUUGUGUAA -3';  
6 CK1ε siRNA (149), 5'-ACAUCGAGAGCAAGUUCUA-3';  
7 CK1ε siRNA (734), 5'-CCUCCGAAUUCUCAACAUA-3'.  
8 PPP1CA siRNA (423), 5'-GAGACGCUACAACAUCAACUGUGG -3'.  
9 PPP1CA siRNA (756), 5'-AGACGGCUACGAGUUCUUUGCCAAG -3'.  
10 PPP1CB siRNA (563), 5'-UUAUGAGACCUACUGAUGU -3'.  
11 PPP1CB siRNA (1137), 5'-CUAAUAGAAAGAUGUGCUACACUGU -3'.  
12 For control siRNA, Mission siRNA Universal Negative Control #1 (Merck) was used.  
13 The number in the parentheses represents the starting base pair of the target sequence.  
14 Of note, PPP1CB siRNA (1137) is targeted to 3'UTR.

15

## 16 **Immunofluorescence microscopy**

17 Immunofluorescence microscopy analysis was performed as described previously (Saito  
18 et al., 2014). Cells grown on coverslips were washed with PBS, fixed with methanol (6  
19 min at -20°C), and then washed with PBS and blocked in blocking solution (5% BSA in  
20 PBS with 0.1% Triton X-100 for 30 min). After blocking, cells were stained with primary  
21 antibody (1 h at room temperature) followed by incubation with Alexa Fluor-conjugated  
22 secondary antibodies (Alexa Fluor 488, Alexa Fluor 568, and/or Alexa Fluor 647 for 1 h  
23 at room temperature). Images were acquired with confocal laser scanning microscopy  
24 (Plan APOchromat 63×/1.40 NA oil immersion objective lens; LSM 700; Carl Zeiss). The  
25 acquired images were processed with Zen 2009 software (Carl Zeiss). All imaging was  
26 performed at room temperature.

27

## 28 **Quantification of Pearson's colocalization coefficient**

29 HeLa cells were fixed and stained with indicated antibodies. Stained cells were analyzed  
30 by confocal laser scanning microscopy (Plan APOchromat 63×/1.40 NA oil immersion  
31 objective lens; LSM 700; Carl Zeiss) and processed with Zen 2011 software (Carl Zeiss).  
32 Intensity scanning and calculating coefficient were performed by colocalization plugin  
33 Coloc2 in Fiji-ImageJ (Schindelin et al., 2012).



1

## 2 **Quantification of ER exit site size**

3 HeLa cells were fixed and stained with indicated antibodies. Stained cells were analyzed  
4 by confocal laser scanning microscopy (Plan APOCHROMAT 63×/1.40 NA oil immersion  
5 objective lens; LSM 700; Carl Zeiss) and processed with Zen 2011 software (Carl Zeiss).  
6 The size distribution of each ER exit site stained with Sec16 was analyzed by Fiji-ImageJ.

7

## 8 **In vitro kinase assay**

9 0.57  $\mu$ M of purified recombinant GST-TANGO1 PPS+PRD-His<sub>6</sub> (1,651–1,907 aa for  
10 TANGO1L; 529–785 aa for TANGO1S) or GST-TANGO1 PPS+PRD (SA)-His<sub>6</sub> were  
11 incubated with 0.24  $\mu$ M of CK1 $\delta$  (1–317aa), 20 mM Tris-HCl (pH 7.4), 150 mM NaCl,  
12 0.1% Triton X-100, 11.4 mM MgCl<sub>2</sub>, and 4.75 mM [ $\gamma$ -<sup>32</sup>P] ATP at 30 °C for 1h. Kinase  
13 assay was stopped by boiling with Laemmli Sample buffer. The samples were then  
14 subjected to SDS-PAGE followed by exposing with phosphor plate analyzed by Typhoon  
15 FLA9500 (GE healthcare).

16

## 17 **Online supplemental material**

18 Figure S1 shows Sec23 depletion does not affect the enlargement of ER exit sites with  
19 IC261 treatment. Figure S2 shows purity of recombinant proteins used in the *in vitro*  
20 kinase assay. Figure S3 shows the degree of phosphorylation in TANGO1 PPS and its  
21 correlation with the dissociation of ER exit sites. Figure S4 shows that CK1 is required  
22 for mitotic ER exit site dissociation according to nocodazole block analysis.

23

## 24 **Acknowledgements**

25 This work was supported by Grant-in-Aid for Scientific Research (18H06063 to M.M.  
26 and 17H03651, 19K22612 to K.S.) from the Ministry of Education, Culture, Sports,  
27 Science and Technology of Japan, by Takeda Science Foundation to K.S., The Uehara  
28 Memorial Foundation to K.S., and The Naito Foundation to K.S. and by Suzuken  
29 Memorial Foundation to M.M.

30

31 The authors declare no competing financial interests.

32

1 Author contributions: Miharu Maeda designed and performed research, analyzed data,  
2 and wrote the manuscript; Yukie Komatsu performed research; and Kota Saito designed  
3 and performed research, analyzed data, and wrote the manuscript.  
4

## 1 REFERENCES

- 2 Bannykh, S.I., T. Rowe, and W.E. Balch. 1996. The organization of endoplasmic  
3 reticulum export complexes. *J Cell Biol.* 135:19-35.
- 4 Bhandari, D., J. Zhang, S. Menon, C. Lord, S. Chen, J.R. Helm, K. Thorsen, K.D.  
5 Corbett, J.C. Hay, and S. Ferro-Novick. 2013. Sit4p/PP6 regulates ER-to-Golgi  
6 traffic by controlling the dephosphorylation of COPII coat subunits. *Mol Biol*  
7 *Cell.* 24:2727-2738.
- 8 Blom, N., S. Gammeltoft, and S. Brunak. 1999. Sequence and structure-based  
9 prediction of eukaryotic protein phosphorylation sites. *J Mol Biol.* 294:1351-  
10 1362.
- 11 Centonze, F., and H. Farhan. 2019. Crosstalk of endoplasmic reticulum exit sites and  
12 cellular signaling. *Febs Letters.*
- 13 Centonze, F., V. Reiterer, K. Nalbach, K. Saito, K. Pawlowski, C. Behrends, and H.  
14 Farhan. 2019. LTK is an ER-resident receptor tyrosine kinase that regulates  
15 secretion. *Journal of Cell Biology.* 218:2470-2480.
- 16 Dudognon, P., C. Maeder-Garavaglia, J.L. Carpentier, and J.P. Paccaud. 2004.  
17 Regulation of a COPII component by cytosolic O-glycosylation during mitosis.  
18 *FEBS Lett.* 561:44-50.
- 19 Farhan, H., M.W. Wendeler, S. Mitrovic, E. Fava, Y. Silberberg, R. Sharan, M. Zerial,  
20 and H.P. Hauri. 2010. MAPK signaling to the early secretory pathway revealed  
21 by kinase/phosphatase functional screening. *J Cell Biol.* 189:997-1011.
- 22 Farmaki, T., S. Ponnambalam, A.R. Prescott, H. Clausen, B.L. Tang, W. Hong, and  
23 J.M. Lucocq. 1999. Forward and retrograde trafficking in mitotic animal cells.  
24 ER-Golgi transport arrest restricts protein export from the ER into COPII-coated  
25 structures. *J Cell Sci.* 112 ( Pt 5):589-600.
- 26 Gelens, L., J. Qian, M. Bollen, and A.T. Saurin. 2018. The Importance of Kinase-  
27 Phosphatase Integration: Lessons from Mitosis. *Trends Cell Biol.* 28:6-21.
- 28 Graves, P.R., and P.J. Roach. 1995. Role of COOH-terminal phosphorylation in the  
29 regulation of casein kinase I delta. *J Biol Chem.* 270:21689-21694.
- 30 Hammond, A.T., and B.S. Glick. 2000. Dynamics of transitional endoplasmic reticulum  
31 sites in vertebrate cells. *Mol Biol Cell.* 11:3013-3030.

- 1 Hornbeck, P.V., B. Zhang, B. Murray, J.M. Kornhauser, V. Latham, and E. Skrzypek.  
2 2015. PhosphoSitePlus, 2014: mutations, PTMs and recalibrations. *Nucleic*  
3 *Acids Res.* 43:D512-520.
- 4 Hughes, H., and D.J. Stephens. 2010. Sec16A defines the site for vesicle budding from  
5 the endoplasmic reticulum on exit from mitosis. *J Cell Sci.* 123:4032-4038.
- 6 Jongasma, M.L., I. Berlin, and J. Neefjes. 2015. On the move: organelle dynamics during  
7 mitosis. *Trends Cell Biol.* 25:112-124.
- 8 Kano, F., H. Kondo, A. Yamamoto, A.R. Tanaka, N. Hosokawa, K. Nagata, and M.  
9 Murata. 2005. The maintenance of the endoplasmic reticulum network is  
10 regulated by p47, a cofactor of p97, through phosphorylation by cdc2 kinase.  
11 *Genes Cells.* 10:333-344.
- 12 Kano, F., A.R. Tanaka, S. Yamauchi, H. Kondo, and M. Murata. 2004. Cdc2 kinase-  
13 dependent disassembly of endoplasmic reticulum (ER) exit sites inhibits ER-to-  
14 Golgi vesicular transport during mitosis. *Mol Biol Cell.* 15:4289-4298.
- 15 Kinoshita, E., E. Kinoshita-Kikuta, K. Takiyama, and T. Koike. 2006. Phosphate-  
16 binding tag, a new tool to visualize phosphorylated proteins. *Mol Cell*  
17 *Proteomics.* 5:749-757.
- 18 Kreiner, T., and H.P. Moore. 1990. Membrane traffic between secretory compartments  
19 is differentially affected during mitosis. *Cell Regul.* 1:415-424.
- 20 Lord, C., D. Bhandari, S. Menon, M. Ghassemian, D. Nycz, J. Hay, P. Ghosh, and S.  
21 Ferro-Novick. 2011. Sequential interactions with Sec23 control the direction of  
22 vesicle traffic. *Nature.* 473:181-186.
- 23 Lu, L., M.S. Ladinsky, and T. Kirchhausen. 2009. Cisternal organization of the  
24 endoplasmic reticulum during mitosis. *Mol Biol Cell.* 20:3471-3480.
- 25 Maeda, M., T. Katada, and K. Saito. 2017. TANGO1 recruits Sec16 to coordinately  
26 organize ER exit sites for efficient secretion. *J Cell Biol.* 216:1731-1743.
- 27 Maeda, M., K. Kurokawa, T. Katada, A. Nakano, and K. Saito. 2019. COPII proteins  
28 exhibit distinct subdomains within each ER exit site for executing their  
29 functions. *Scientific Reports.* 9.
- 30 Maeda, M., K. Saito, and T. Katada. 2016. Distinct isoform-specific complexes of  
31 TANGO1 cooperatively facilitate collagen secretion from the endoplasmic  
32 reticulum. *Mol Biol Cell.* 27:2688-2696.

- 1 Mashhoon, N., A.J. DeMaggio, V. Tereshko, S.C. Bergmeier, M. Egli, M.F. Hoekstra,  
2 and J. Kuret. 2000. Crystal structure of a conformation-selective casein kinase-1  
3 inhibitor. *J Biol Chem.* 275:20052-20060.
- 4 Miller, E.A., and R. Schekman. 2013. COPII - a flexible vesicle formation system. *Curr*  
5 *Opin Cell Biol.*
- 6 Moura, M., and C. Conde. 2019. Phosphatases in Mitosis: Roles and Regulation.  
7 *Biomolecules.* 9.
- 8 Murakami, A., K. Kimura, and A. Nakano. 1999. The inactive form of a yeast casein  
9 kinase I suppresses the secretory defect of the sec12 mutant. Implication of  
10 negative regulation by the Hrr25 kinase in the vesicle budding from the  
11 endoplasmic reticulum. *J Biol Chem.* 274:3804-3810.
- 12 Nakamura, N., M. Lowe, T.P. Levine, C. Rabouille, and G. Warren. 1997. The vesicle  
13 docking protein p115 binds GM130, a cis-Golgi matrix protein, in a mitotically  
14 regulated manner. *Cell.* 89:445-455.
- 15 Nilsson, J. 2019. Protein phosphatases in the regulation of mitosis. *J Cell Biol.* 218:395-  
16 409.
- 17 Pecot, M.Y., and V. Malhotra. 2004. Golgi membranes remain segregated from the  
18 endoplasmic reticulum during mitosis in mammalian cells. *Cell.* 116:99-107.
- 19 Puhka, M., H. Vihinen, M. Joensuu, and E. Jokitalo. 2007. Endoplasmic reticulum  
20 remains continuous and undergoes sheet-to-tubule transformation during cell  
21 division in mammalian cells. *J Cell Biol.* 179:895-909.
- 22 Saito, K., M. Chen, F. Bard, S. Chen, H. Zhou, D. Woodley, R. Polischuk, R.  
23 Schekman, and V. Malhotra. 2009. TANGO1 facilitates cargo loading at  
24 endoplasmic reticulum exit sites. *Cell.* 136:891-902.
- 25 Saito, K., and T. Katada. 2015. Mechanisms for exporting large-sized cargoes from the  
26 endoplasmic reticulum. *Cell Mol Life Sci.* 72:3709-3720.
- 27 Saito, K., and M. Maeda. 2019. Not just a cargo receptor for large cargoes; an emerging  
28 role of TANGO1 as an organizer of ER exit sites. *J Biochem.* 166:115-119.
- 29 Saito, K., M. Maeda, and T. Katada. 2017. Regulation of the Sar1 GTPase Cycle Is  
30 Necessary for Large Cargo Secretion from the Endoplasmic Reticulum. *Front*  
31 *Cell Dev Biol.* 5:75.

- 1 Saito, K., K. Yamashiro, Y. Ichikawa, P. Erlmann, K. Kontani, V. Malhotra, and T.  
2 Katada. 2011. cTAGE5 mediates collagen secretion through interaction with  
3 TANGO1 at endoplasmic reticulum exit sites. *Mol Biol Cell*. 22:2301-2308.
- 4 Saito, K., K. Yamashiro, N. Shimazu, T. Tanabe, K. Kontani, and T. Katada. 2014.  
5 Concentration of Sec12 at ER exit sites via interaction with cTAGE5 is required  
6 for collagen export. *J Cell Biol*. 206:751-762.
- 7 Santos, A.J., C. Nogueira, M. Ortega-Bellido, and V. Malhotra. 2016. TANGO1 and  
8 Mia2/cTAGE5 (TALI) cooperate to export bulky pre-chylomicrons/VLDLs  
9 from the endoplasmic reticulum. *J Cell Biol*. 213:343-354.
- 10 Schindelin, J., I. Arganda-Carreras, E. Frise, V. Kaynig, M. Longair, T. Pietzsch, S.  
11 Preibisch, C. Rueden, S. Saalfeld, B. Schmid, J.Y. Tinevez, D.J. White, V.  
12 Hartenstein, K. Eliceiri, P. Tomancak, and A. Cardona. 2012. Fiji: an open-  
13 source platform for biological-image analysis. *Nat Methods*. 9:676-682.
- 14 Schitteck, B., and T. Sinnberg. 2014. Biological functions of casein kinase 1 isoforms  
15 and putative roles in tumorigenesis. *Mol Cancer*. 13:231.
- 16 Sengupta, P., P. Satpute-Krishnan, A.Y. Seo, D.T. Burnette, G.H. Patterson, and J.  
17 Lippincott-Schwartz. 2015. ER trapping reveals Golgi enzymes continually  
18 revisit the ER through a recycling pathway that controls Golgi organization.  
19 *Proc Natl Acad Sci U S A*. 112:E6752-6761.
- 20 Shin, K.J., E.A. Wall, J.R. Zavzavadjian, L.A. Santat, J. Liu, J.I. Hwang, R. Rebres, T.  
21 Roach, W. Seaman, M.I. Simon, and I.D. Fraser. 2006. A single lentiviral vector  
22 platform for microRNA-based conditional RNA interference and coordinated  
23 transgene expression. *Proc Natl Acad Sci U S A*. 103:13759-13764.
- 24 Stuart, R.A., D. Mackay, J. Adamczewski, and G. Warren. 1993. Inhibition of intra-  
25 Golgi transport in vitro by mitotic kinase. *J Biol Chem*. 268:4050-4054.
- 26 Subramanian, A., A. Capalbo, N. Iyengar, R. Rizzo, A. di Campli, R. Di Martino, M.  
27 Lo Monte, A. Beccari, A. Yerudkar, C. del Vecchio, L. Glielmo, G. Turacchio,  
28 M. Pirozzi, S. Kim, P. Henklein, J. Cancino, S. Parashuraman, D. Diviani, F.  
29 Fanelli, M. Sallese, and A. Luini. 2019. Auto-regulation of Secretory Flux by  
30 Sensing and Responding to the Folded Cargo Protein Load in the Endoplasmic  
31 Reticulum. *Cell*. 176:1461-+.
- 32 Tanabe, T., M. Maeda, K. Saito, and T. Katada. 2016. Dual function of cTAGE5 in  
33 collagen export from the endoplasmic reticulum. *Mol Biol Cell*. 27:2008-2013.

- 1 Tillmann, K.D., V. Reiterer, F. Baschieri, J. Hoffmann, V. Millarte, M.A. Hauser, A.  
2 Mazza, N. Atias, D.F. Legler, R. Sharan, M. Weiss, and H. Farhan. 2015.  
3 Regulation of Sec16 levels and dynamics links proliferation and secretion. *J Cell*  
4 *Sci.* 128:670-682.
- 5 Valente, C., and A. Colanzi. 2015. Mechanisms and Regulation of the Mitotic  
6 Inheritance of the Golgi Complex. *Front Cell Dev Biol.* 3:79.
- 7 Venerando, A., M. Ruzzene, and L.A. Pinna. 2014. Casein kinase: the triple meaning of  
8 a misnomer. *Biochem J.* 460:141-156.
- 9 Villeneuve, J., J. Duran, M. Scarpa, L. Bassaganyas, J. Van Galen, and V. Malhotra.  
10 2017. Golgi enzymes do not cycle through the endoplasmic reticulum during  
11 protein secretion or mitosis. *Mol Biol Cell.* 28:141-151.
- 12 Warren, G., C. Featherstone, G. Griffiths, and B. Burke. 1983. Newly synthesized G  
13 protein of vesicular stomatitis virus is not transported to the cell surface during  
14 mitosis. *J Cell Biol.* 97:1623-1628.
- 15 Xu, P., C. Ianes, F. Gärtner, C. Liu, T. Burster, V. Bakulev, N. Rachidi, U. Knippschild,  
16 and J. Bischof. 2019. Structure, regulation, and (patho-)physiological functions  
17 of the stress-induced protein kinase CK1 delta (CSNK1D). *Gene.* 715:144005.
- 18 Yang, Y., T. Xu, Y. Zhang, and X. Qin. 2017. Molecular basis for the regulation of the  
19 circadian clock kinases CK1 $\delta$  and CK1 $\epsilon$ . *Cell Signal.* 31:58-65.
- 20 Yeong, F.M. 2013. Multi-step down-regulation of the secretory pathway in mitosis: a  
21 fresh perspective on protein trafficking. *Bioessays.* 35:462-471.
- 22 Zaal, K.J., C.L. Smith, R.S. Polishchuk, N. Altan, N.B. Cole, J. Ellenberg, K.  
23 Hirschberg, J.F. Presley, T.H. Roberts, E. Siggia, R.D. Phair, and J. Lippincott-  
24 Schwartz. 1999. Golgi membranes are absorbed into and reemerge from the ER  
25 during mitosis. *Cell.* 99:589-601.
- 26 Zacharogianni, M., V. Kondylis, Y. Tang, H. Farhan, D. Xanthakis, F. Fuchs, M.  
27 Boutros, and C. Rabouille. 2011. ERK7 is a negative regulator of protein  
28 secretion in response to amino-acid starvation by modulating Sec16 membrane  
29 association. *EMBO J.* 30:3684-3700.
- 30 Zaytsev, A.V., J.E. Mick, E. Maslennikov, B. Nikashin, J.G. DeLuca, and E.L.  
31 Grishchuk. 2015. Multisite phosphorylation of the NDC80 complex gradually  
32 tunes its microtubule-binding affinity. *Mol Biol Cell.* 26:1829-1844.

1 Zeuschner, D., W.J. Geerts, E. van Donselaar, B.M. Humbel, J.W. Slot, A.J. Koster, and  
2 J. Klumperman. 2006. Immuno-electron tomography of ER exit sites reveals the  
3 existence of free COPII-coated transport carriers. *Nat Cell Biol.* 8:377-383.  
4  
5  
6



1 **FIGURE LEGENDS**

2 **Figure 1. CK1 regulates ER exit site organization.** (A) HeLa cells transfected with  
3 HA-CK1 $\alpha$ , HA-CK1 $\delta$ , or HA-CK1 $\delta$  K38R were fixed and stained with anti-Sec16-C,  
4 anti-Sec31 (m), and anti-HA antibodies. Bars = 10  $\mu$ m. (right) Magnification of the  
5 indicated regions on the left. Bars = 5  $\mu$ m. (B) Quantification of Pearson's colocalization  
6 coefficient for (A). Error bars represent the mean  $\pm$  SEM. \* $p < 0.05$ , n.s.: not significant.  
7 (C) 293T cells transfected with indicated constructs were lysed and the lysates were  
8 subjected to SDS-PAGE followed by western blotting with anti-HA, anti-CK1 $\epsilon$ , anti-  
9 GAPDH, anti-TANGO1-CC1, anti-Sec16-N, and anti-Sec31 (r) antibodies. (D) HeLa  
10 cells transfected with the indicated siRNAs were fixed and stained with anti-Sec16-C,  
11 anti-Sec31(m) and anti-Sec23 antibodies. Bars = 10  $\mu$ m. (E) Quantification of ER exit  
12 site size distribution from (D). (F) HeLa cells transfected with indicated siRNAs were  
13 lysed and the lysates were subjected to SDS-PAGE followed by western blotting with  
14 anti-CK1 $\delta$ , anti-CK1 $\epsilon$ , anti-GAPDH, anti-TANGO1-CC1, anti-Sec16-N, and anti-  
15 Sec31(r) antibodies. (G) HeLa cells were treated with either DMSO or 10  $\mu$ M of IC261  
16 for 12 h. Cells were fixed and stained with anti-Sec16-C, anti-Sec31(m), and anti-Sec23  
17 antibodies. Bars = 10  $\mu$ m. (H) Quantification of ER exit site size distribution from (G).

18  
19 **Figure 2. CK1 reduces the interaction between Sec16 and TANGO1.** (A) 293T cells  
20 were transfected with HA-CK1 $\delta$  or HA-CK1 $\delta$  K38R with FLAG-Sec16 constructs as  
21 indicated. Cell lysates were immunoprecipitated with anti-FLAG antibody and eluted  
22 with a FLAG peptide. Eluates were then subjected to SDS-PAGE followed by western  
23 blotting with anti-FLAG and anti-HA antibodies. (B) Schematic representation of human  
24 Sec16 domain organization. ELD, ER exit site localization domain; CCD, central  
25 conserved domain; CTCD, C-terminal conserved domain. (C) 293T cells were transfected  
26 with indicated FLAG-tagged Sec16 deletion constructs with HA-CK1 $\delta$  constructs as  
27 indicated. Cell lysates were immunoprecipitated with anti-FLAG antibody and eluted  
28 with a FLAG peptide. Eluates were then subjected to SDS-PAGE followed by western  
29 blotting with anti-FLAG and anti-HA antibodies. (D) 293T cells were transfected with  
30 FLAG-Sec16 (1101–1890 aa) or TANGO1S-FLAG and HA-CK1 $\delta$  or HA-CK1 $\delta$  K38R  
31 constructs. Cell lysates were immunoprecipitated with anti-FLAG antibody and eluted  
32 with a FLAG peptide. Eluates were then subjected to SDS-PAGE followed by western  
33 blotting with anti-FLAG and anti-HA antibodies. (E) 293T cells were transfected with

1 FLAG-Sec16 (1101–1890 aa), TANGO1S-HA, and HA-CK1 $\delta$  constructs as indicated.  
2 Cell lysates were immunoprecipitated with anti-FLAG antibody and eluted with a FLAG  
3 peptide. Eluates were then subjected to SDS-PAGE followed by western blotting with  
4 anti-FLAG and anti-HA antibodies.

5

6 **Figure 3. The PPS domain of TANGO1 is phosphorylated by CK1 in an *in vitro***  
7 **kinase assay.** (A) Schematic representation of TANGO1 domain organization. PPS,  
8 phosphorylation predicted sequences; SIR, Sec16-interacting region; PRD, proline-rich  
9 domain. (B) Alignment of human TANGO1 PPS with corresponding regions from other  
10 species. Identical amino acids are shaded in black and similar amino acids are shaded in  
11 gray. (C) *In vitro* kinase assay was performed with purified recombinant GST-TANGO1  
12 PPS+PRD-His<sub>6</sub> or GST-TANGO1 PPS+PRD (SA)-His<sub>6</sub> with CK1 $\delta$  (1–317 aa).

13

14 **Figure 4. CK1-mediated TANGO1 phosphorylation dissociates ER exit sites.** (A)  
15 293T cells were transfected with FLAG-Sec16 and TANGO1S-HA or TANGO1S (SE)-  
16 HA or TANGO1S (SA)-HA constructs. Cell lysates were immunoprecipitated with an  
17 anti-FLAG antibody and eluted with a FLAG peptide. Eluates were then subjected to  
18 SDS-PAGE followed by western blotting with anti-FLAG and anti-HA antibodies. (B)  
19 293T cells were transfected with FLAG-Sec16 (1101–1890 aa), TANGO1S (SA)-HA,  
20 and HA-CK1 $\delta$  constructs as indicated. Cell lysates were immunoprecipitated with an anti-  
21 FLAG antibody and eluted with a FLAG peptide. Eluates were then subjected to SDS-  
22 PAGE followed by western blotting with anti-FLAG and anti-HA antibodies. (C) HeLa  
23 cells were treated with TANGO1L and TANGO1S siRNAs. After 24 h, indicated HA-  
24 tagged TANGO1S constructs were transfected and cells were further cultured for 24 h.  
25 The cells were fixed and stained with anti-Sec16, anti-Sec31, and anti-HA antibodies.  
26 Bars = 10  $\mu$ m. (D) Quantification of Pearson's colocalization coefficient for (C). Error  
27 bars represent means  $\pm$  SEM. \* $p < 0.05$ , n.s.: not significant.

28

29 **Figure 5. The phosphorylation of TANGO1 is required for mitotic ER exit site**  
30 **dissociation.** (A) Non-treated HeLa cells and HeLa cells synchronized at mitotic phase  
31 with double thymidine block were fixed and stained with anti-Sec16-C, anti-Sec31(m),  
32 or TO-PRO3. Bars = 10  $\mu$ m. (B) Quantification of Pearson's colocalization coefficient  
33 for (A). (C) Non-treated HeLa cells and HeLa cells synchronized at mitotic phase with

1 double thymidine block were fixed and stained with anti-TANGO1-CT, anti-Sec31(m),  
2 or TO-PRO3. Bars = 10  $\mu$ m. (D) Quantification of Pearson's colocalization coefficient  
3 for (C). (E) Interphase extracts of doxycycline-inducible HeLa cells expressing either  
4 TANGO1S-FLAG or TANGO1S (SA)-FLAG were collected. Mitotic extracts were  
5 collected through treatment of nocodazole followed by shake-off. Cell lysates were  
6 immunoprecipitated with an anti-FLAG antibody and eluted with a FLAG peptide.  
7 Eluates were subjected to SDS-PAGE followed by biotinylated Phos-tag detection or  
8 western blotting with an anti-FLAG antibody. Lysates were subjected to SDS-PAGE  
9 followed by western blotting with anti-CK1 $\delta$ , anti-GAPDH, and anti-cyclinB1 antibodies.  
10 (F) Doxycycline-inducible HeLa cells expressing either TANGO1S-FLAG or TANGO1S  
11 (SA)-FLAG were synchronized in the mitotic phase by double thymidine block. Cells  
12 were then fixed and stained with anti-Sec16-C, anti-Sec31(m), or TO-PRO3. Bars = 10  
13  $\mu$ m. (G) Quantification of Pearson's colocalization coefficient for (F). (H) Doxycycline-  
14 inducible HeLa cells expressing either TANGO1S-FLAG or TANGO1S (SA)-FLAG  
15 were synchronized in the mitotic phase by double thymidine block. Cells were then fixed  
16 and stained with anti-FLAG, anti-Sec31 (m), and TO-PRO3. Bars = 10  $\mu$ m. (I)  
17 Quantification of Pearson's colocalization coefficient for (H). Error bars represent the  
18 means  $\pm$  SEM. \*p < 0.05, n.s.: not significant.

19  
20 **Figure 6. Inhibition of PP1 results in ER exit site dissociation.** (A) HeLa cells were  
21 not treated or treated with 50 nM okadaic acid or 1  $\mu$ M endothall for 2 h. Cells were fixed  
22 and stained with anti-Sec16-C and anti-Sec31(m) antibodies. Bars = 10  $\mu$ m. (B)  
23 Quantification of Pearson's colocalization coefficient for (A). (C) HeLa cells transfected  
24 with the indicated siRNAs were fixed and stained with anti-Sec16-C and anti-Sec31(m)  
25 antibodies. Bars = 10  $\mu$ m. (D) Quantification of Pearson's colocalization coefficient for  
26 (C). (E) HeLa cells transfected with indicated siRNAs were lysed and the lysates were  
27 subjected to SDS-PAGE followed by western blotting with anti-PPP1CA, anti-PPP1CB,  
28 and anti-GAPDH antibodies. (F) Doxycycline-inducible HeLa cells expressing either  
29 TANGO1S-FLAG or TANGO1S (SA)-FLAG were not treated or treated with 50 nM  
30 okadaic acid for 2 h. Cell lysates were immunoprecipitated with an anti-FLAG antibody  
31 and eluted with a FLAG peptide. Eluates were subjected to SDS-PAGE followed by  
32 biotinylated Phos-tag detection or western blotting with an anti-FLAG antibody. (G)  
33 Doxycycline-inducible HeLa cells expressing either TANGO1S-FLAG or TANGO1S

1 (SA)-FLAG were not treated or treated with 50 nM okadaic acid or 1  $\mu$ M endothall for 2  
2 h. Cells were fixed and stained with anti-Sec16-C and anti-Sec31(m) antibodies and  
3 quantified based on Pearson's colocalization coefficient. Error bars represent the mean  
4  $\pm$  SEM. \* $p < 0.05$ , n.s.: not significant.

5  
6 **Figure 7. CK1 is required for mitotic ER exit site dissociation.** (A) HeLa cells  
7 transfected with indicated siRNAs were synchronized at mitotic phase with double  
8 thymidine block. Cells were then fixed and stained with anti-Sec16-C, anti-Sec31(m), or  
9 TO-PRO3. Bars = 10  $\mu$ m. (B) Quantification of Pearson's colocalization coefficient for  
10 (A). (C) HeLa cells transfected with indicated siRNAs were synchronized at mitotic phase  
11 with double thymidine block. Cells were then fixed and stained with anti-TANGO1-CT,  
12 anti-Sec31(m), or TO-PRO3. Bars = 10  $\mu$ m. (D) Quantification of Pearson's  
13 colocalization coefficient for (C). Error bars represent the mean  $\pm$  SEM. \* $p < 0.05$ .

14  
15 **Figure 8. Schematic diagram of mitotic ER exit site dissociation.** (A) ER and Golgi  
16 morphology during the cell cycle. In mitotic cells, Golgi membranes are fragmented and  
17 either stay as a Golgi haze or are fused with the ER. (B) Activity of CK1 and PP1 during  
18 the cell cycle. CK1 activity is unchanged throughout the cell cycle. Conversely, PP1  
19 activity is suppressed during mitosis. (C) The phosphorylation status of TANGO1 is  
20 equilibrated via phosphorylation by CK1 and dephosphorylation by PP1 in interphase  
21 cells. During mitosis, the Cdk1/cyclinB1-dependent phosphorylation of PP1 reduces its  
22 activity and TANGO1 is hyperphosphorylated. (D) Interactions between TANGO1 and  
23 Sec16 result in ER exit site organization in interphase cells. The phosphorylation of  
24 TANGO1 reduces its binding to Sec16, leading to the dissociation of ER exit sites during  
25 mitosis.

26  
27 **Figure S1. Sec23 depletion does not affect the enlargement of ER exit sites with**  
28 **IC261 treatment.** (A) HeLa cells transfected with indicated siRNAs were treated with  
29 either DMSO or 10  $\mu$ M of IC261 for 12 h. Cells were fixed and stained with anti-Sec16-  
30 C and anti-Sec23 antibodies. Bars = 10  $\mu$ m. (B) Quantification of ER exit site size  
31 distribution from (A).

32

1 **Figure S2. Recombinant proteins used in the *in vitro* kinase assay.** Recombinant GST-  
2 TANGO1 PRD-His<sub>6</sub>, GST-TANGO1 PRD (SA)-His<sub>6</sub>, CK1δ (1–317 aa), and CK1δ KR  
3 (1–317 aa) were resolved by SDS-PAGE followed by Coomassie brilliant blue staining.  
4 The asterisks indicate bacterial protein contaminants.

5

6 **Figure S3. Degree of phosphorylation in TANGO1 PPS is correlated with ER exit**  
7 **site dissociation.** (A) Sequences of human TANGO1 PPS mutants. (B) 293T cells were  
8 transfected with FLAG-Sec16 and the indicated TANGO1S-HA mutants. Cell lysates  
9 were immunoprecipitated with an anti-FLAG antibody and eluted with a FLAG peptide.  
10 Eluates were then subjected to SDS-PAGE followed by western blotting with anti-FLAG  
11 and anti-HA antibodies. (C) HeLa cells were treated with TANGO1L and TANGO1S  
12 siRNAs. After 24 h, the indicated TANGO1S-HA mutants were transfected and further  
13 cultured for 24 h. The cells were fixed and stained with anti-Sec16-C and anti-Sec31(m)  
14 antibodies and quantified based on Pearson's colocalization coefficient. Error bars  
15 represent the means ± SEM. \*p < 0.05 compared to TANGO1LS KD, n.s.: not significant  
16 compared to TANGO1LS KD.

17

18 **Figure S4. CK1 is required for ER exit site dissociation at prometaphase.** (A) HeLa  
19 cells transfected with indicated siRNAs were synchronized in the mitotic phase by  
20 nocodazole block. Cells were then fixed and stained with anti-Sec16-C, anti-Sec31(m),  
21 and TO-PRO3. Bars = 10 μm. (B) Quantification of Pearson's colocalization coefficient  
22 for (A). Error bars represent the means ± SEM. \*p < 0.05.

23

24

25

26

27

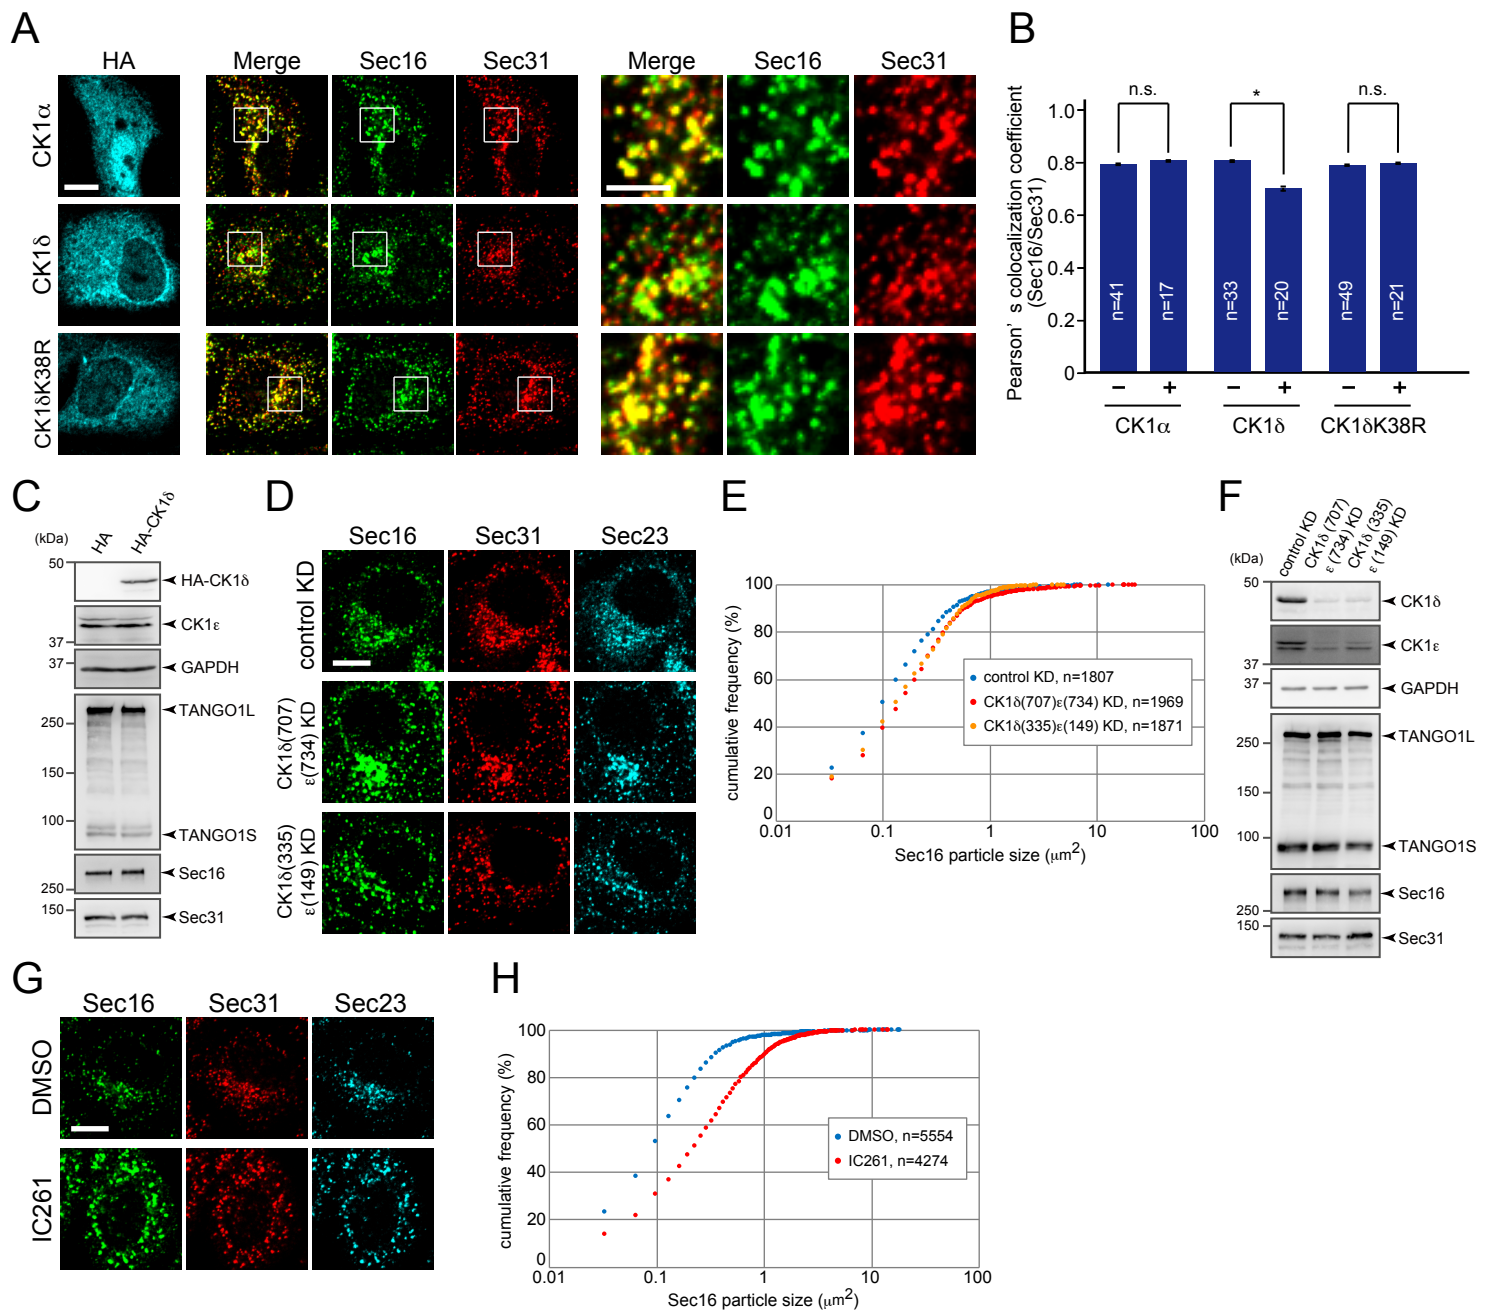

Fig. 1



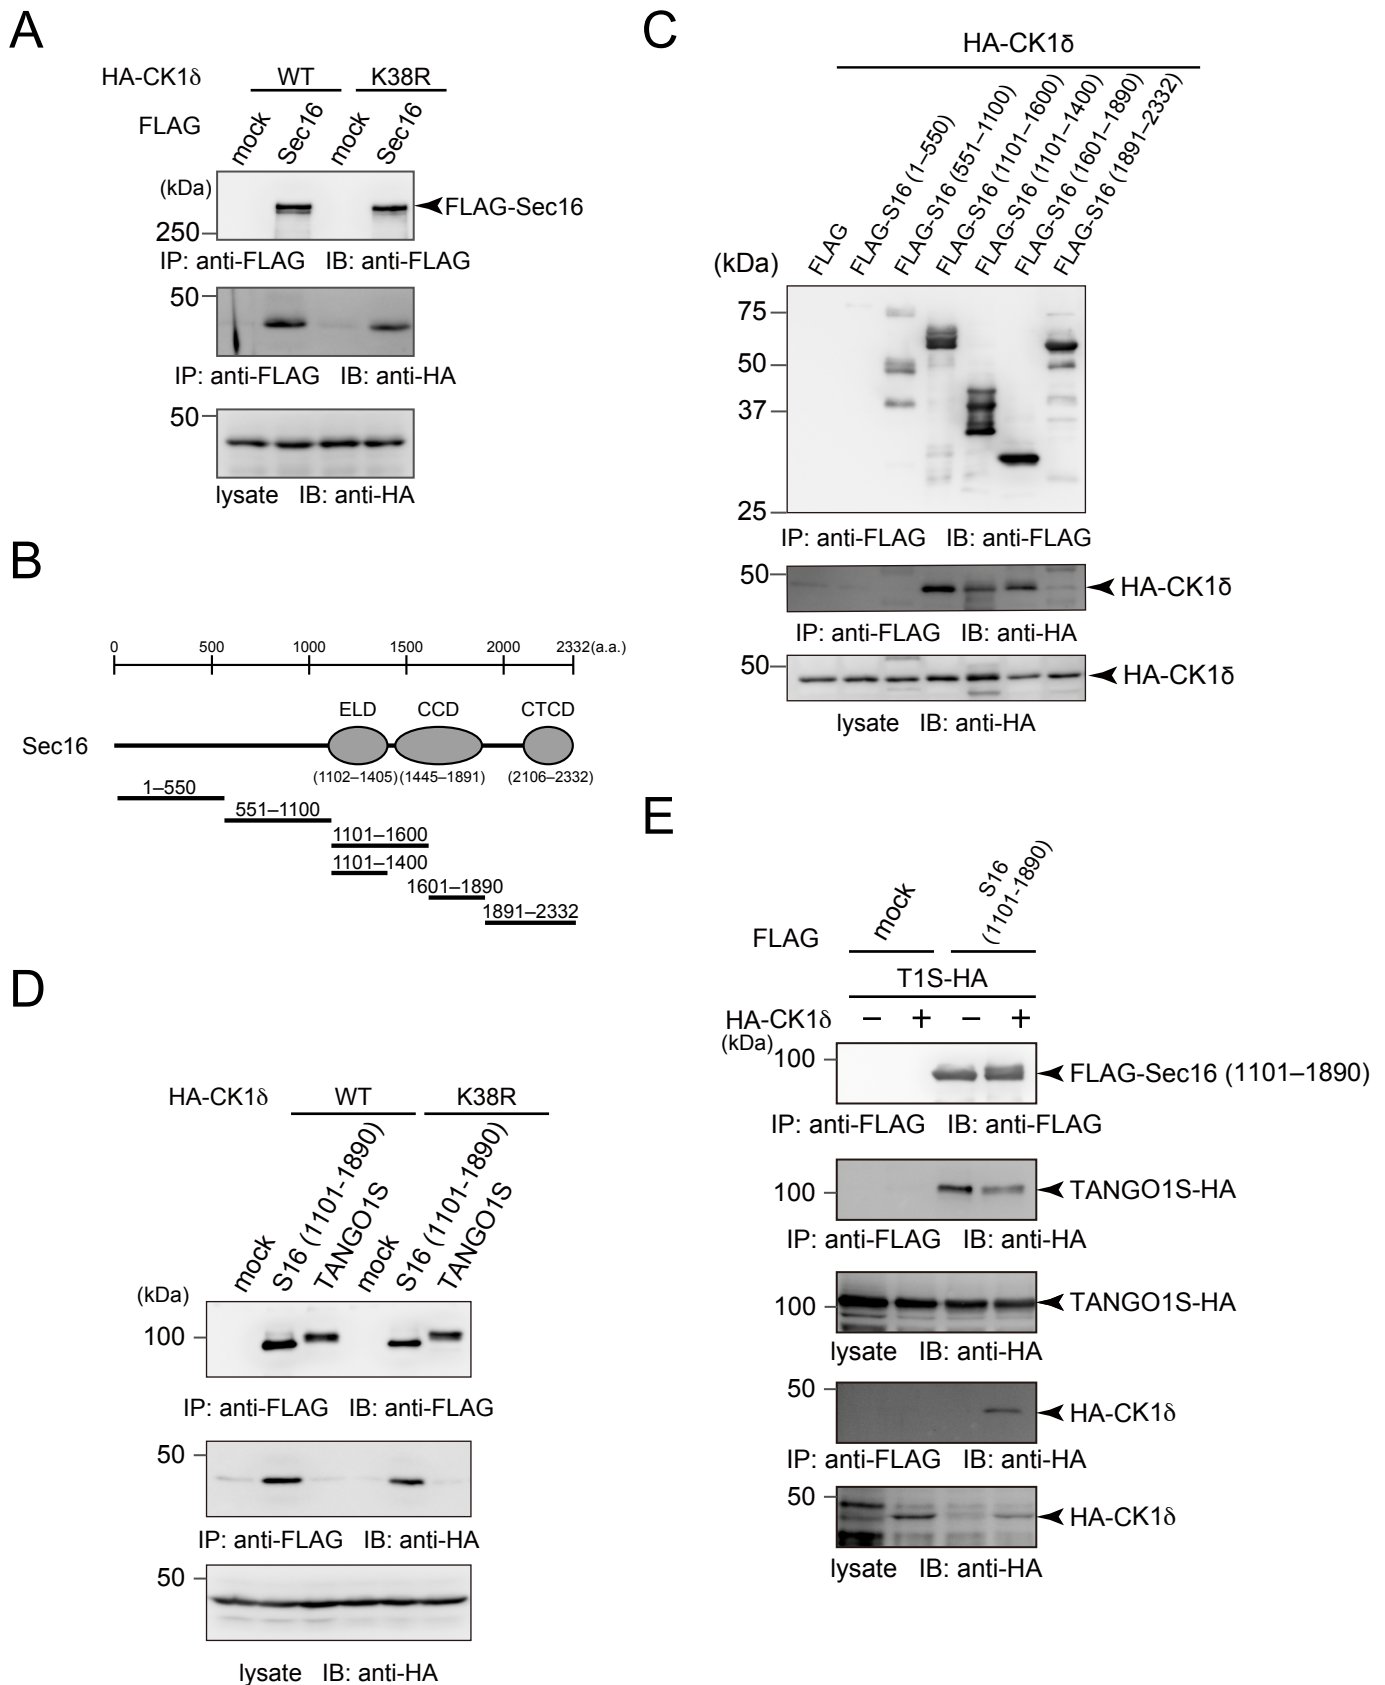

Fig. 2

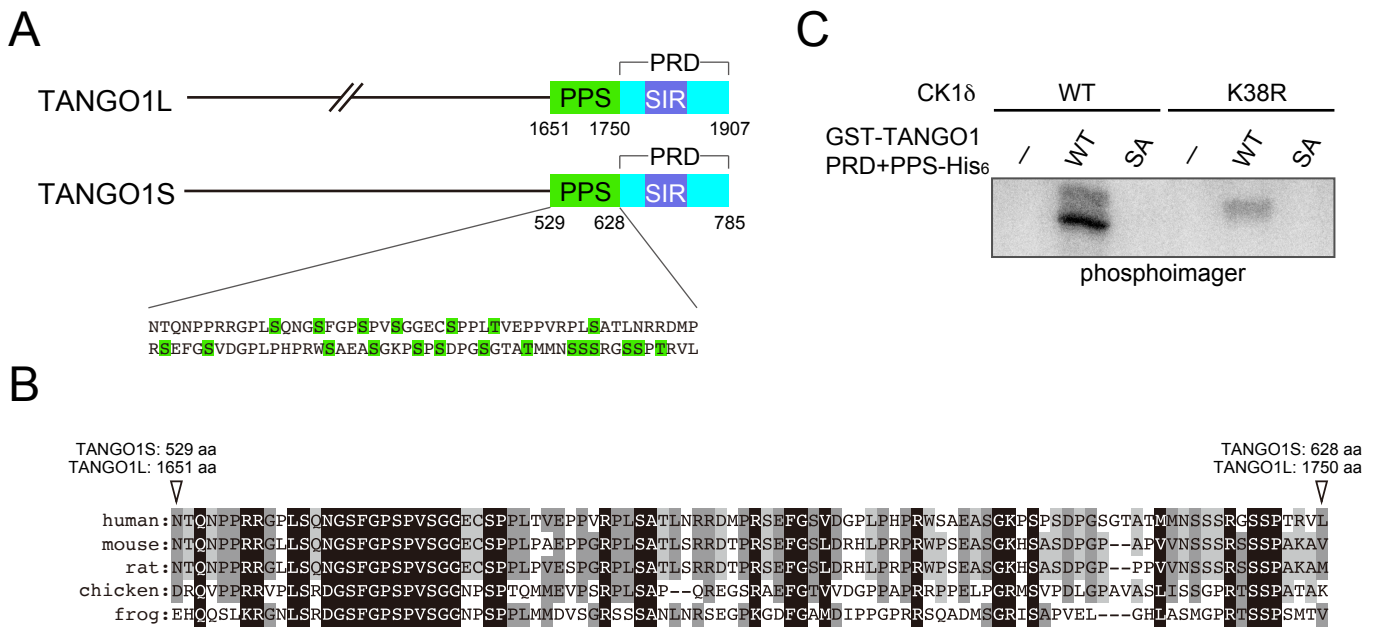

Fig. 3



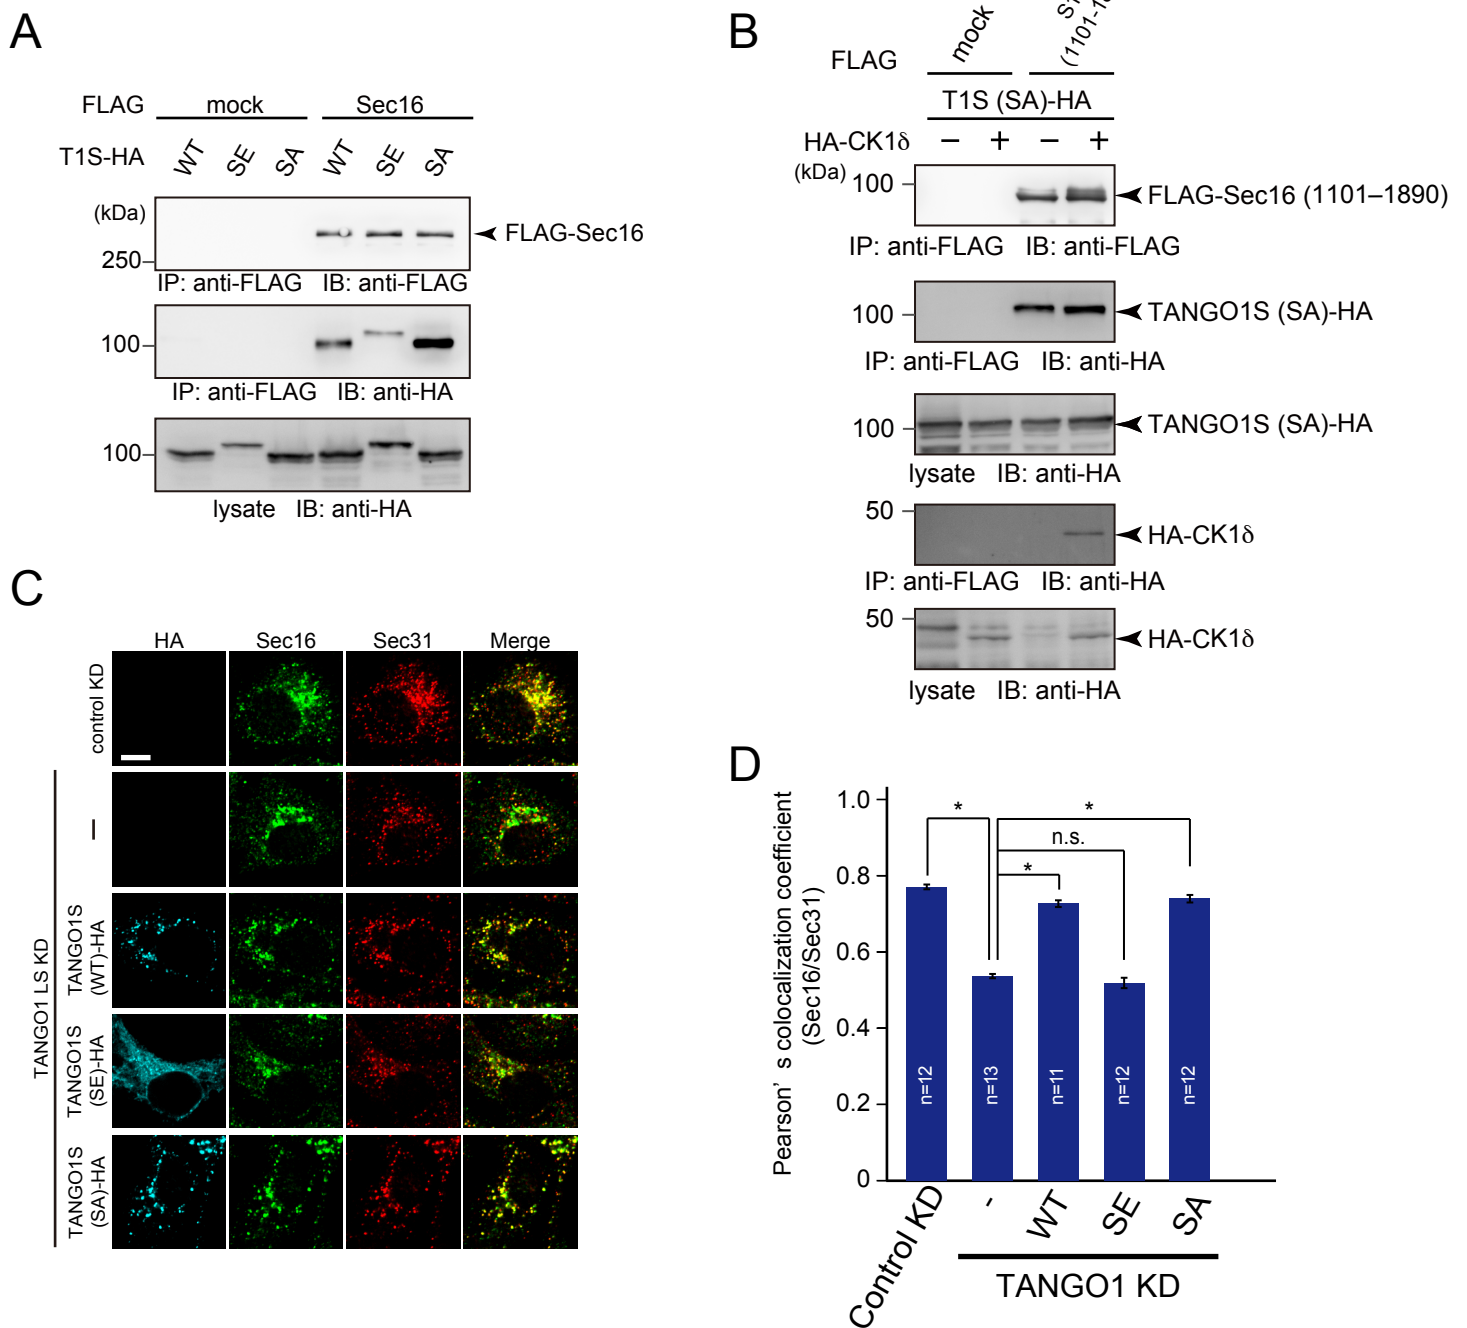

Fig. 4

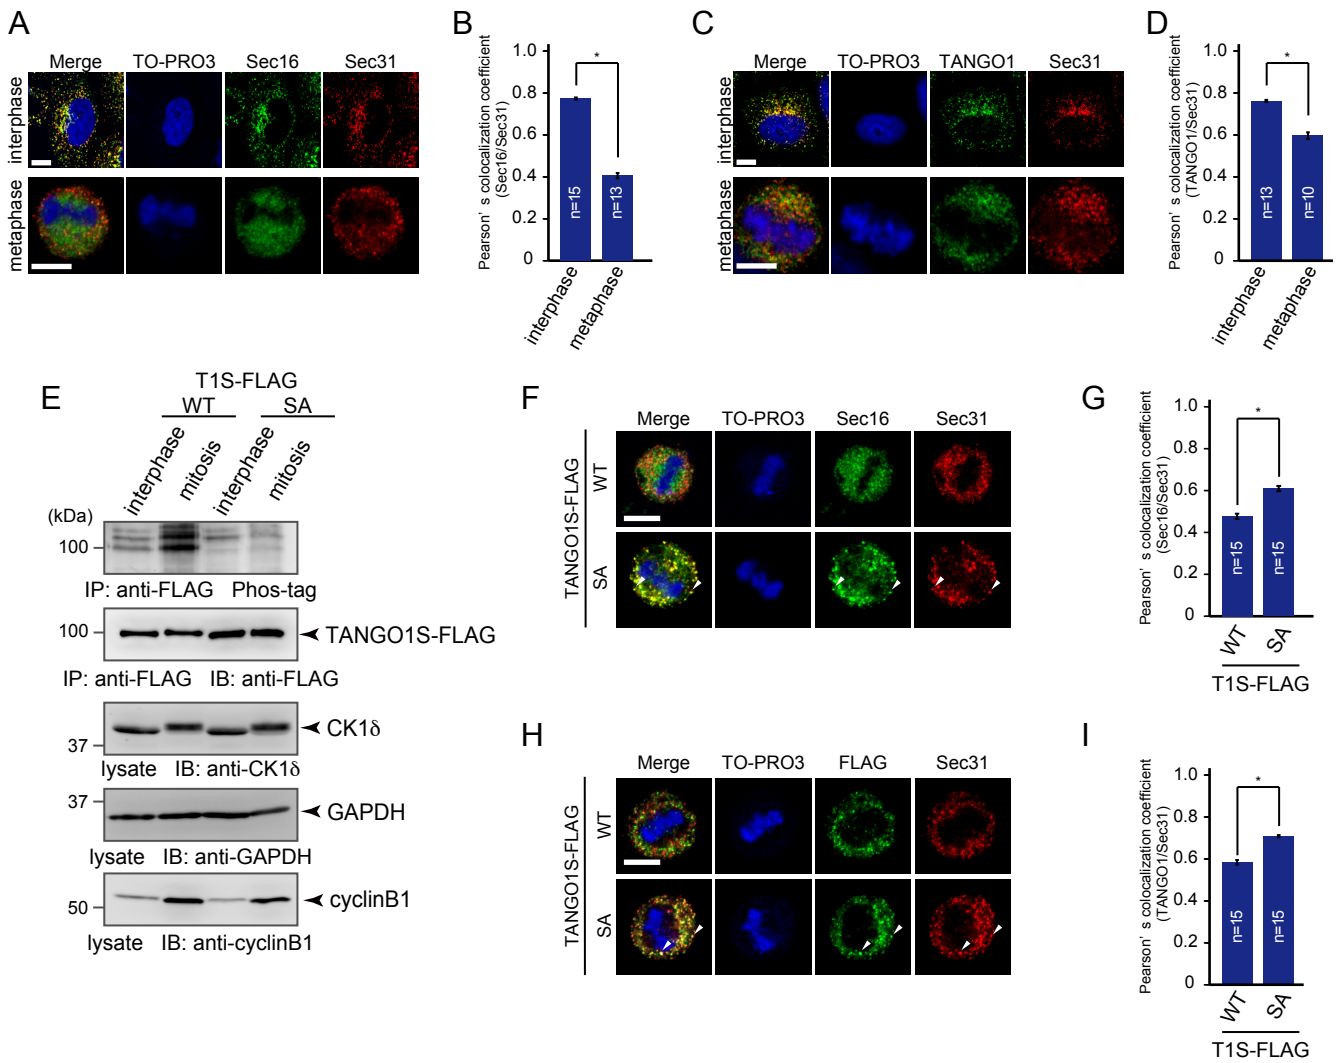

Fig. 5

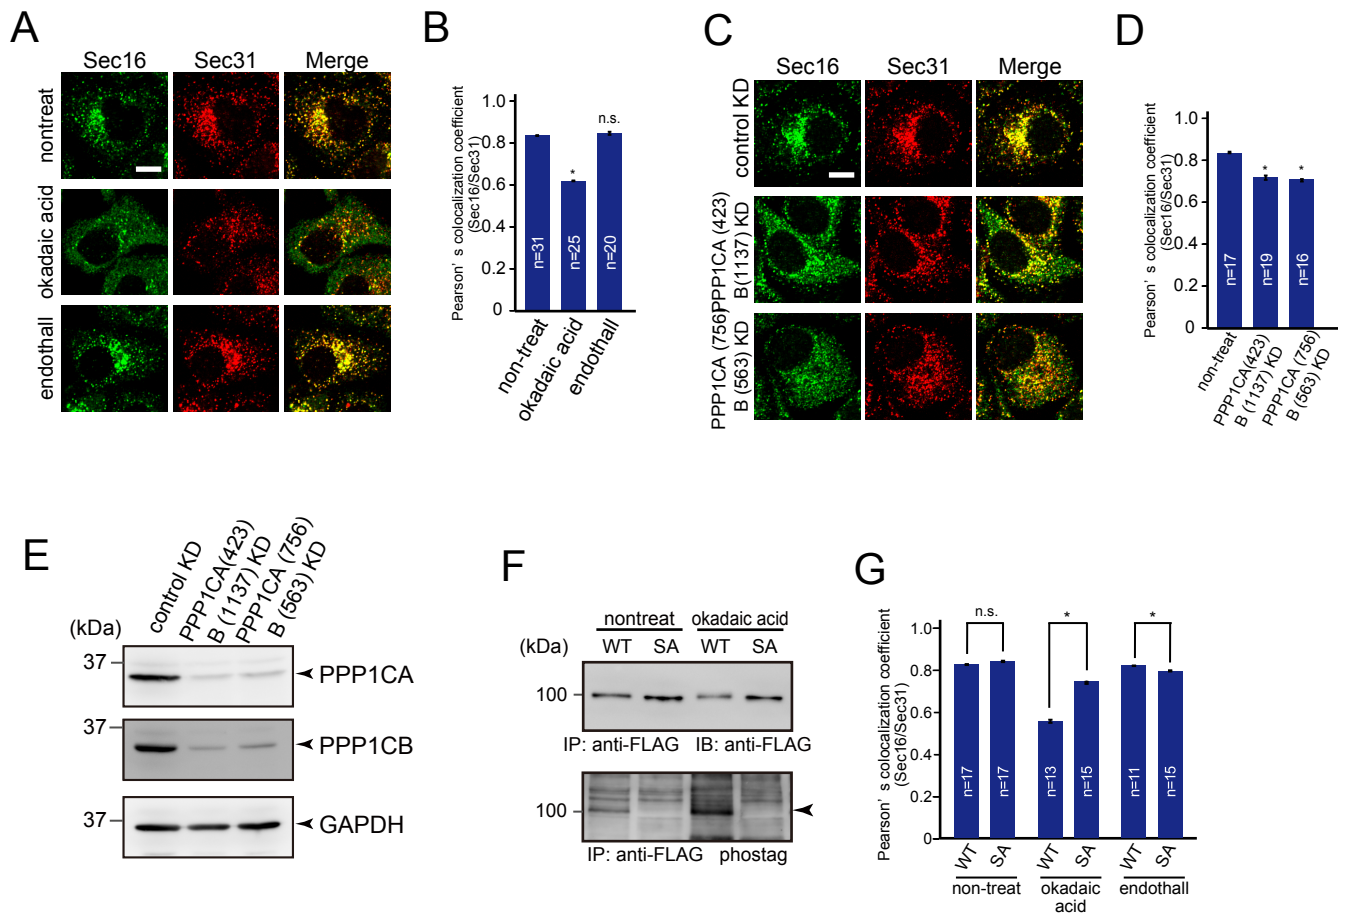

Fig. 6

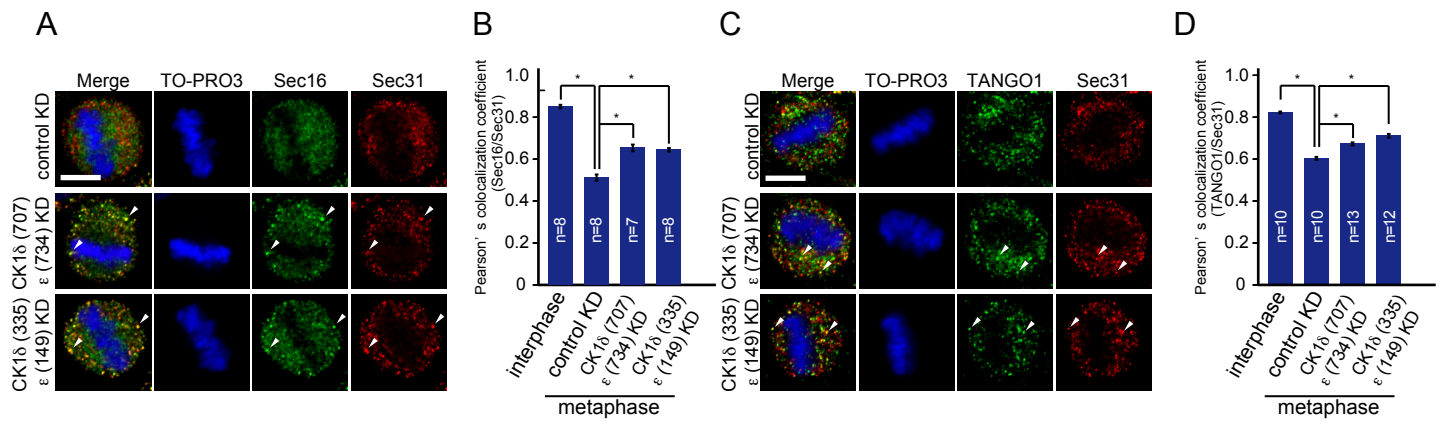

Fig. 7

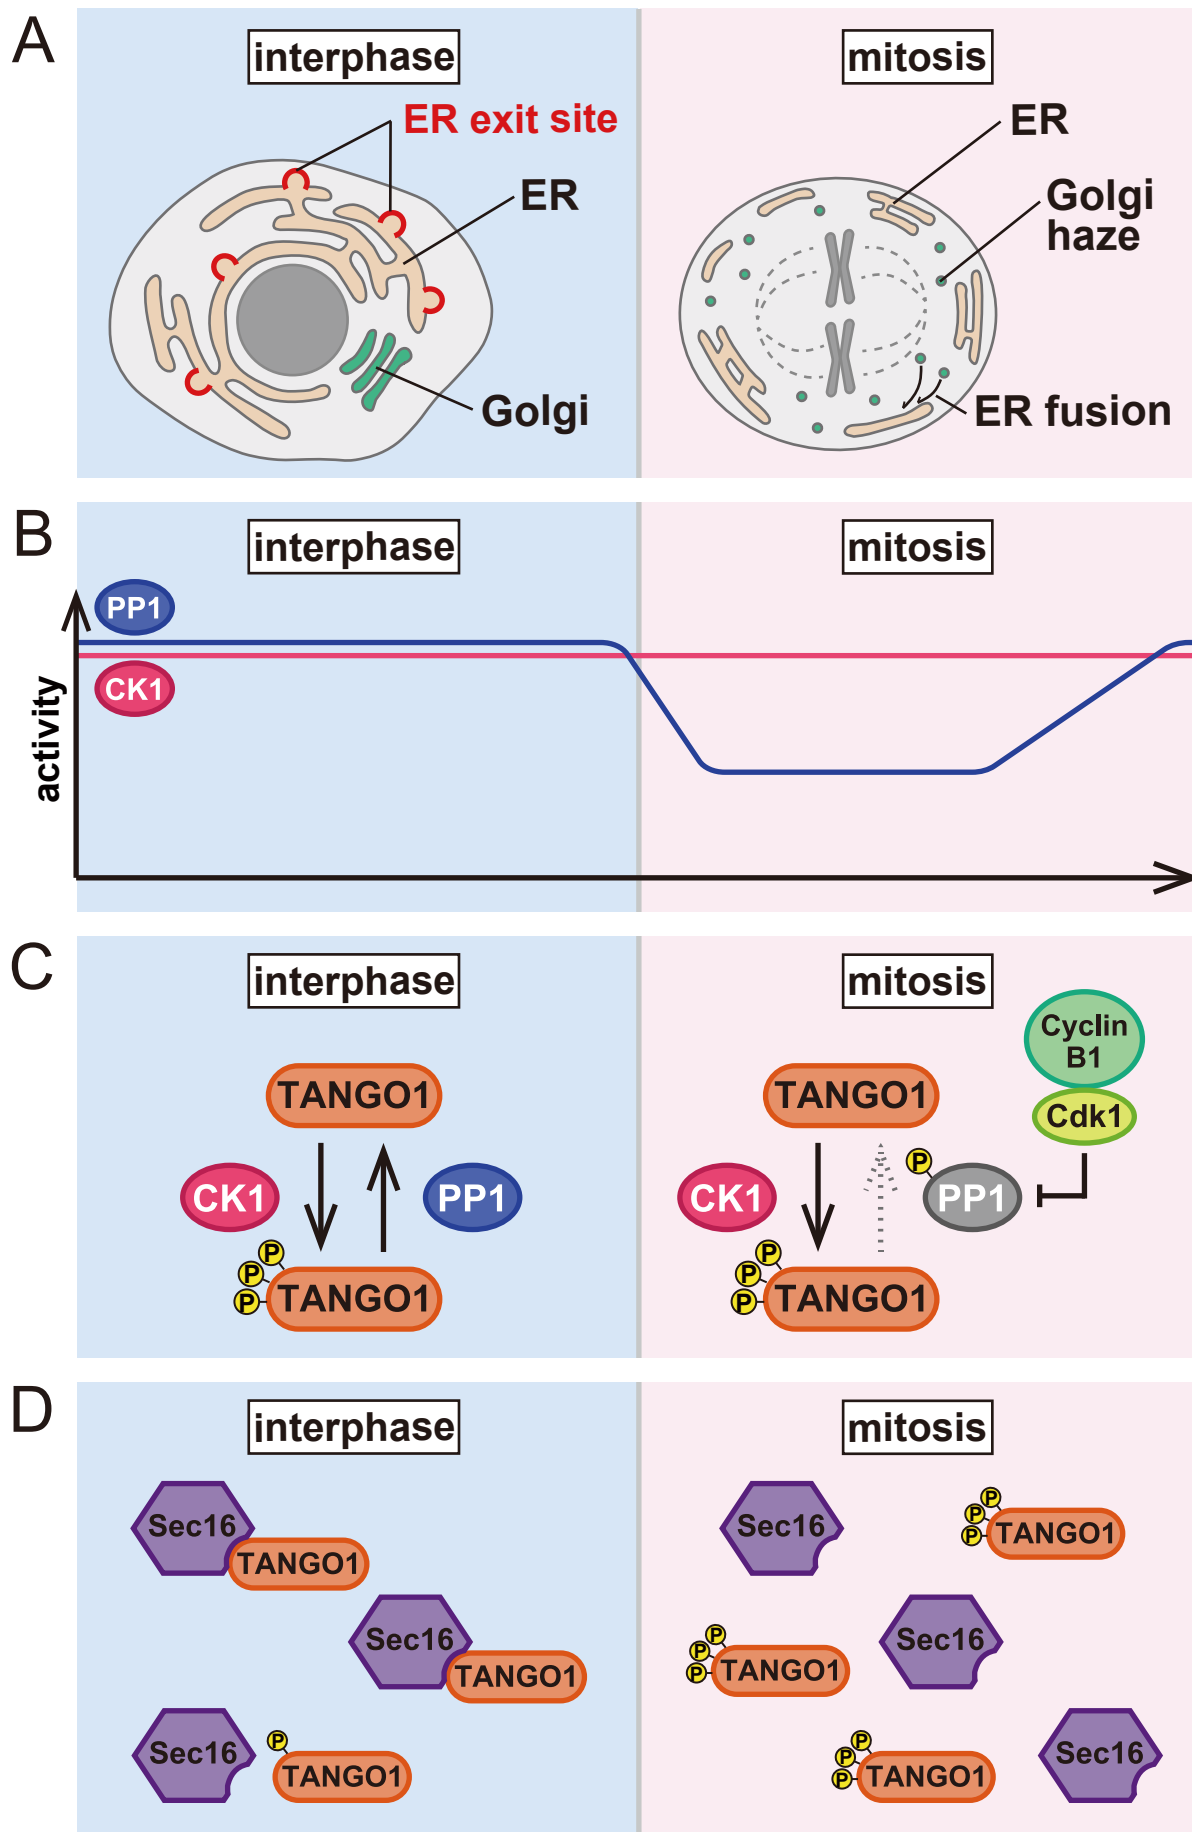

Fig. 8

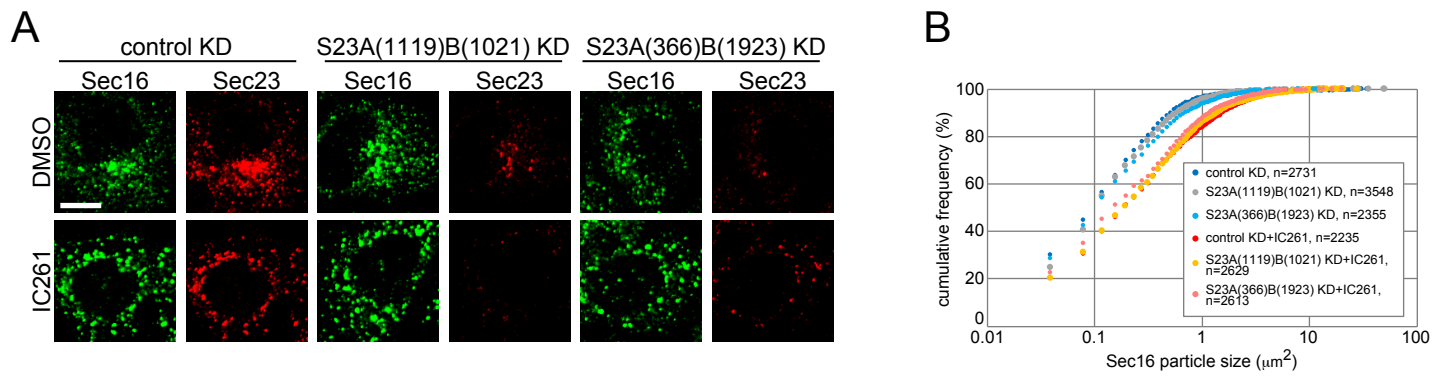

Fig. S1

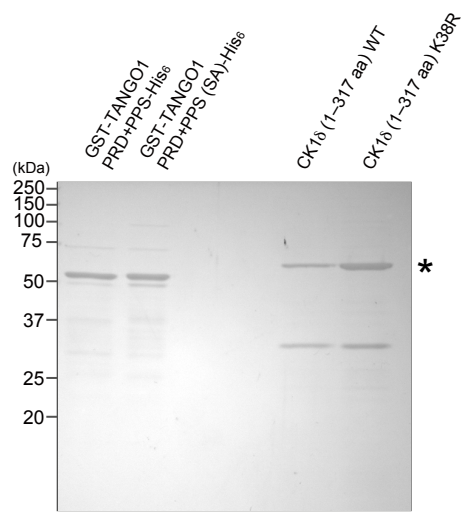

Fig. S2

**A**

WT: NTQNPPRRGPLSQNGSFGPSPVSGGECSPPLTVEPPVRPLSATLNRRDMRSEFGSVDGGLPHPRWSAEASGKPSPSDPGSGTATMMN~~SSSRGSS~~PT~~TRVL~~  
 SE: NTQNPPRRGPLEQNGSFGPSPVSGGECSPPLTVEPPVRPLEATLNRRDMRSEFGSEVDGGLPHPRWSEAEAE~~EGKPE~~PE~~DPGEGTAE~~MMN~~EEERGE~~EE~~PERVL~~  
 mut 1: NTQNPPRRGPLSQNGSFGPSPVSGGECSPPLTVEPPVRPLEATLNRRDMRSEFGSEVDGGLPHPRWSEAEASGKPSPE~~DPGSGTATMMN~~EEERGE~~EE~~PT~~TRVL~~  
 mut 2: NTQNPPRRGPLEQNGSFGPSPVSGGECSPPLTVEPPVRPLSATLNRRDMRSEFGSVDGGLPHPRWSEAEAE~~EGKPE~~PS~~DPGEGTAE~~MMN~~SSSRGSS~~PT~~TRVL~~  
 mut 3: NTQNPPRRGPLSQNGSFGPSPVSGGECSPPLTVEPPVRPLSATLNRRDMRSEFGSVDGGLPHPRWSEAEASGKPSPE~~DPGSGTATMMN~~EEERGE~~EE~~PT~~TRVL~~  
 mut 4: NTQNPPRRGPLSQNGSFGPSPVSGGECSPPLTVEPPVRPLEATLNRRDMRSEFGSEVDGGLPHPRWSEAEASGKPSPS~~DPGSGTATMMN~~SSSRGSS~~PT~~TRVL  
 mut 5: NTQNPPRRGPLSQNGSFGPSPVSGGECSPPLTVEPPVRPLSATLNRRDMRSEFGSVDGGLPHPRWSEAEAE~~EGKPE~~PS~~DPGEGTAE~~MMN~~SSSRGSS~~PT~~TRVL~~  
 mut 6: NTQNPPRRGPLEQNGSFGPSPVSGGECSPPLTVEPPVRPLSATLNRRDMRSEFGSVDGGLPHPRWSEAEASGKPSPS~~DPGSGTATMMN~~SSSRGSS~~PT~~TRVL

**B**

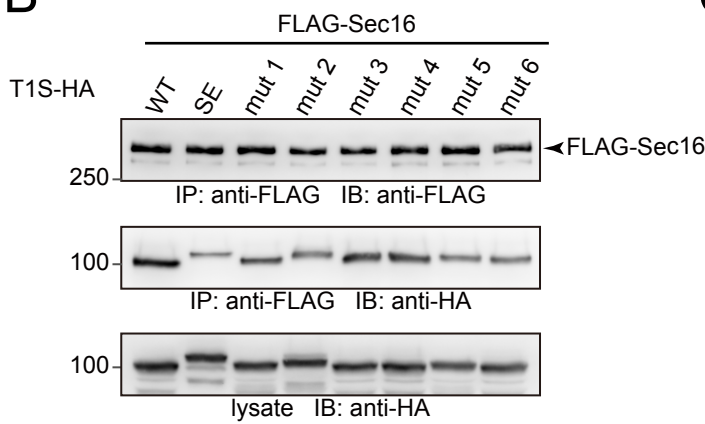

**C**

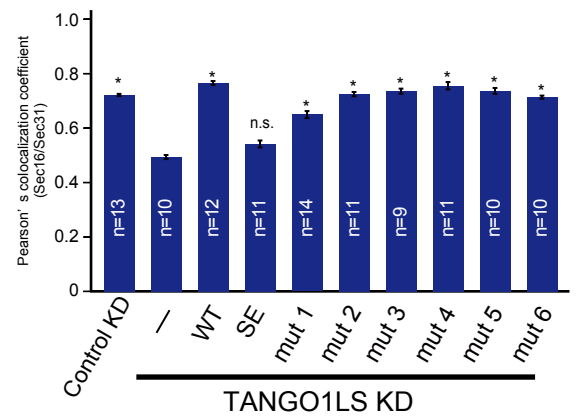

Fig. S3



A

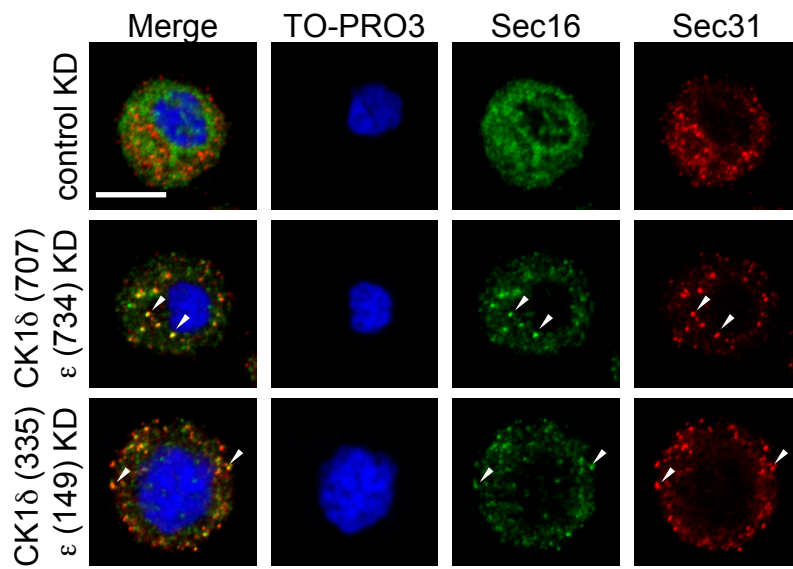

B

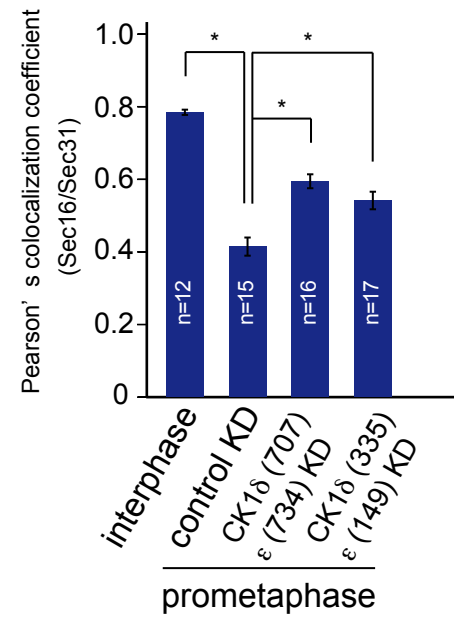

Fig. S4
